# Supplementary material for: Potential impacts of climate change on geographical distribution of three primary vectors of African Trypanosomiasis in Tanzania’s Maasai Steppe: G. m. morsitans, G. pallidipes and G. swynnertoni
Source: PubMed Central journal article supplement (PMC7904224; doi:10.1371/journal.pntd.0009081), 2021-02-11
Supplement: pntd.0009081.s011.pdf [file pntd.0009081.s011.pdf]

# PLOS Neglected Tropical Diseases

## Potential Impacts of Climate Change on Geographical Distribution of Three Primary Vectors of African Trypanosomiasis in Tanzania Maasai Steppe; *G. m. morsitans*, *G. pallidipes* and *G. swynnertoni* --Manuscript Draft--

|                                                                                                                                                                                                                                                                                                                                                                                                                                         |                                                                                                                                                                                                                                                                                                                                                                                                                                                                                                                                                                                                                                                                                                                                                                                                                                                                                                                                                                                                                                                                                                                                                                                                                                                                                                                                                                                                                                                                                                                                                                                                                                                                                                                                                                                                                                                                                                                                                                                                                                                                                                                                                                                           |
|-----------------------------------------------------------------------------------------------------------------------------------------------------------------------------------------------------------------------------------------------------------------------------------------------------------------------------------------------------------------------------------------------------------------------------------------|-------------------------------------------------------------------------------------------------------------------------------------------------------------------------------------------------------------------------------------------------------------------------------------------------------------------------------------------------------------------------------------------------------------------------------------------------------------------------------------------------------------------------------------------------------------------------------------------------------------------------------------------------------------------------------------------------------------------------------------------------------------------------------------------------------------------------------------------------------------------------------------------------------------------------------------------------------------------------------------------------------------------------------------------------------------------------------------------------------------------------------------------------------------------------------------------------------------------------------------------------------------------------------------------------------------------------------------------------------------------------------------------------------------------------------------------------------------------------------------------------------------------------------------------------------------------------------------------------------------------------------------------------------------------------------------------------------------------------------------------------------------------------------------------------------------------------------------------------------------------------------------------------------------------------------------------------------------------------------------------------------------------------------------------------------------------------------------------------------------------------------------------------------------------------------------------|
| <b>Manuscript Number:</b>                                                                                                                                                                                                                                                                                                                                                                                                               | PNTD-D-20-00736                                                                                                                                                                                                                                                                                                                                                                                                                                                                                                                                                                                                                                                                                                                                                                                                                                                                                                                                                                                                                                                                                                                                                                                                                                                                                                                                                                                                                                                                                                                                                                                                                                                                                                                                                                                                                                                                                                                                                                                                                                                                                                                                                                           |
| <b>Full Title:</b>                                                                                                                                                                                                                                                                                                                                                                                                                      | Potential Impacts of Climate Change on Geographical Distribution of Three Primary Vectors of African Trypanosomiasis in Tanzania Maasai Steppe; <i>G. m. morsitans</i> , <i>G. pallidipes</i> and <i>G. swynnertoni</i>                                                                                                                                                                                                                                                                                                                                                                                                                                                                                                                                                                                                                                                                                                                                                                                                                                                                                                                                                                                                                                                                                                                                                                                                                                                                                                                                                                                                                                                                                                                                                                                                                                                                                                                                                                                                                                                                                                                                                                   |
| <b>Short Title:</b>                                                                                                                                                                                                                                                                                                                                                                                                                     | Climate Change and Vectors of African Trypanosomiasis                                                                                                                                                                                                                                                                                                                                                                                                                                                                                                                                                                                                                                                                                                                                                                                                                                                                                                                                                                                                                                                                                                                                                                                                                                                                                                                                                                                                                                                                                                                                                                                                                                                                                                                                                                                                                                                                                                                                                                                                                                                                                                                                     |
| <b>Article Type:</b>                                                                                                                                                                                                                                                                                                                                                                                                                    | Research Article                                                                                                                                                                                                                                                                                                                                                                                                                                                                                                                                                                                                                                                                                                                                                                                                                                                                                                                                                                                                                                                                                                                                                                                                                                                                                                                                                                                                                                                                                                                                                                                                                                                                                                                                                                                                                                                                                                                                                                                                                                                                                                                                                                          |
| <b>Keywords:</b>                                                                                                                                                                                                                                                                                                                                                                                                                        | Climate change; Maasai Steppe; tsetse fly; African Trypanosomiasis; MaxEnt; climate envelope; SDM                                                                                                                                                                                                                                                                                                                                                                                                                                                                                                                                                                                                                                                                                                                                                                                                                                                                                                                                                                                                                                                                                                                                                                                                                                                                                                                                                                                                                                                                                                                                                                                                                                                                                                                                                                                                                                                                                                                                                                                                                                                                                         |
| <b>Abstract:</b>                                                                                                                                                                                                                                                                                                                                                                                                                        | <p>In Maasai Steppe, public health and economy are threatened by African Trypanosomiasis; a debilitating and fatal disease to livestock (African Animal Trypanosomiasis -AAT) and humans (Human African Trypanosomiasis - HAT), if not treated. Tsetse fly is a primary vector for both HAT and AAT and climate is an important predictor of their occurrence and parasites they carry. While understanding tsetse fly distribution is essential for informing vector and disease control strategies, existing distribution maps are old and were based on coarse spatial resolution data which is not useful in understanding vector and disease dynamics necessary to design and implement fit for purpose mitigation strategies. Also, assertion that climate change is altering tsetse fly distribution in Tanzania lacks empirical evidence. Despite tsetse fly posing public health risks and economic hardship, no study has modelled their distributions at a scale needed for local planning. This study used MaxEnt species distribution modelling (SDM) and ecological niche modeling tools to predict potential distribution of three tsetse fly species in Tanzania Maasai Steppe from current climate information and project their distributions to midcentury climatic conditions under representative concentration pathways (RCP) 4.5 scenarios. Current climate results predicted that <i>G. m. morsitans</i>, <i>G. pallidipes</i> and <i>G. swynnertoni</i> cover 19,225 km<sup>2</sup>, 7,113 km<sup>2</sup> and 32,335 km<sup>2</sup> and future prediction indicated that by the year 2050, the habitable area may decrease by up to 23.13%, 12.9% and 22.8% of current habitable area respectively. This information can serve as a useful predictor of potential HAT and AAT hotspots and inform surveillance strategies. Distribution maps generated by this study can be useful in guiding tsetse fly control managers, health, livestock and wildlife officers when setting surveys and surveillance programs. The maps can also inform protected area managers of potential encroachment due to shrinkage of tsetse fly habitats in the protected area.</p> |
| <b>Additional Information:</b>                                                                                                                                                                                                                                                                                                                                                                                                          |                                                                                                                                                                                                                                                                                                                                                                                                                                                                                                                                                                                                                                                                                                                                                                                                                                                                                                                                                                                                                                                                                                                                                                                                                                                                                                                                                                                                                                                                                                                                                                                                                                                                                                                                                                                                                                                                                                                                                                                                                                                                                                                                                                                           |
| <b>Question</b>                                                                                                                                                                                                                                                                                                                                                                                                                         | <b>Response</b>                                                                                                                                                                                                                                                                                                                                                                                                                                                                                                                                                                                                                                                                                                                                                                                                                                                                                                                                                                                                                                                                                                                                                                                                                                                                                                                                                                                                                                                                                                                                                                                                                                                                                                                                                                                                                                                                                                                                                                                                                                                                                                                                                                           |
| <p><b>Financial Disclosure</b></p> <p>Enter a financial disclosure statement that describes the sources of funding for the work included in this submission. Review the <a href="#">submission guidelines</a> for detailed requirements. View published research articles from <a href="#">PLOS NTDs</a> for specific examples.</p> <p>This statement is required for submission and <b>will appear in the published article</b> if</p> | <p>The author(s) received no specific funding for this work.</p>                                                                                                                                                                                                                                                                                                                                                                                                                                                                                                                                                                                                                                                                                                                                                                                                                                                                                                                                                                                                                                                                                                                                                                                                                                                                                                                                                                                                                                                                                                                                                                                                                                                                                                                                                                                                                                                                                                                                                                                                                                                                                                                          |

the submission is accepted. Please make sure it is accurate.

#### Unfunded studies

Enter: *The author(s) received no specific funding for this work.*

#### Funded studies

Enter a statement with the following details:

- Initials of the authors who received each award
- Grant numbers awarded to each author
- The full name of each funder
- URL of each funder website
- Did the sponsors or funders play any role in the study design, data collection and analysis, decision to publish, or preparation of the manuscript?
- **NO** - Include this sentence at the end of your statement: *The funders had no role in study design, data collection and analysis, decision to publish, or preparation of the manuscript.*
- **YES** - Specify the role(s) played.

\* typeset

#### Competing Interests

Use the instructions below to enter a competing interest statement for this submission. On behalf of all authors, disclose any [competing interests](#) that could be perceived to bias this work—acknowledging all financial support and any other relevant financial or non-financial competing interests.

This statement **will appear in the published article** if the submission is accepted. Please make sure it is accurate. View published research articles

The authors have declared that no competing interests exist.

from [PLOS NTDs](#) for specific examples.

#### **NO authors have competing interests**

Enter: *The authors have declared that no competing interests exist.*

#### **Authors with competing interests**

Enter competing interest details beginning with this statement:

*I have read the journal's policy and the authors of this manuscript have the following competing interests: [insert competing interests here]*

\* typeset

#### **Data Availability**

Yes - all data are fully available without restriction

Authors are required to make all data underlying the findings described fully available, without restriction, and from the time of publication. PLOS allows rare exceptions to address legal and ethical concerns. See the [PLOS Data Policy](#) and [FAQ](#) for detailed information.

A Data Availability Statement describing where the data can be found is required at submission. Your answers to this question constitute the Data Availability Statement and **will be published in the article**, if accepted.

**Important:** Stating 'data available on request from the author' is not sufficient. If your data are only available upon request, select 'No' for the first question and explain your exceptional situation in the text box.

Do the authors confirm that all data underlying the findings described in their manuscript are fully available without restriction?

**Describe where the data may be found in full sentences. If you are copying our sample text, replace any instances of XXX with the appropriate details.**

- If the data are **held or will be held in a public repository**, include URLs, accession numbers or DOIs. If this information will only be available after acceptance, indicate this by ticking the box below. For example: *All XXX files are available from the XXX database (accession number(s) XXX, XXX).*
- If the data are all contained **within the manuscript and/or Supporting Information files**, enter the following: *All relevant data are within the manuscript and its Supporting Information files.*
- If neither of these applies but you are able to provide **details of access elsewhere**, with or without limitations, please do so. For example:

*Data cannot be shared publicly because of [XXX]. Data are available from the XXX Institutional Data Access / Ethics Committee (contact via XXX) for researchers who meet the criteria for access to confidential data.*

*The data underlying the results presented in the study are available*

At present data are available by writing at happyjackson.nnko@gmail.com

|                                                                                                                                                                                                                                                                                   |                                                                                                                                     |
|-----------------------------------------------------------------------------------------------------------------------------------------------------------------------------------------------------------------------------------------------------------------------------------|-------------------------------------------------------------------------------------------------------------------------------------|
| <p><i>from (include the name of the third party and contact information or URL).</i></p> <ul style="list-style-type: none"><li>• This text is appropriate if the data are owned by a third party and authors do not have permission to share the data.</li></ul> <p>* typeset</p> |                                                                                                                                     |
| Additional data availability information:                                                                                                                                                                                                                                         | Tick here if your circumstances are not covered by the questions above and you need the journal's help to make your data available. |

1 **Potential Impacts of Climate Change on Geographical Distribution of Three Primary**  
2 **Vectors of African Trypanosomiasis in Tanzania Maasai Steppe; *G. m. morsitans*, *G.***  
3 ***pallidipes* and *G. swynnertoni***

4 **Happiness J. Nnko<sup>1\*</sup>, Paul S. Gwakisa<sup>2¶</sup>, Anibariki Ngonyoka<sup>1¶</sup> Calvin Sindato<sup>3&4</sup>, & Anna**  
5 **Estes<sup>5¶</sup>,**

6 <sup>1</sup>University of Dodoma, Dodoma Tanzania,

7 <sup>2</sup>Sokoine University of Agriculture, Morogoro, Tanzania

8 <sup>3</sup>National Institute for Medical Research, Tabora, Tanzania,

9 <sup>4</sup>Southern African Centre for Infectious Disease Surveillance, Morogoro Tanzania &.

10 <sup>5</sup>Carleton University, Canada.

11 \*Corresponding author

12 E-mail:happyjackson.nnko@gmail.com

13 **Abstract**

14 In Maasai Steppe, public health and economy are threatened by African Trypanosomiasis;  
15 a debilitating and fatal disease to livestock (African Animal Trypanosomiasis -AAT) and humans  
16 (Human African Trypanosomiasis - HAT), if not treated. Tsetse fly is a primary vector for both  
17 HAT and AAT and climate is an important predictor of their occurrence and **the** parasites they carry.  
18 While understanding tsetse fly distribution is essential for informing vector and disease control  
19 strategies, existing distribution maps are old and were based on coarse spatial resolution data which  
20 is **not useful** in understanding vector and disease dynamics necessary to design and implement fit

21 for purpose mitigation strategies. Also, assertion that climate change is altering tsetse fly  
22 distribution in Tanzania lacks empirical evidence. Despite tsetse fly posing public health risks and  
23 economic hardship, no study has modelled their distributions at a scale needed for local planning.  
24 This study used MaxEnt species distribution modelling (SDM) and ecological niche modeling  
25 tools to predict potential distribution of three tsetse fly species in Tanzania Maasai Steppe from  
26 current climate information and project their distributions to midcentury climatic conditions under  
27 representative concentration pathways (RCP) 4.5 scenarios. Current climate results predicted that  
28 *G. m. morsitans*, *G. pallidipes* and *G. swynnertoni* cover 19,225 km<sup>2</sup>, 7,113 km<sup>2</sup> and 32,335 km<sup>2</sup>  
29 and future prediction indicated that by the year 2050, the habitable area may decrease by up to  
30 23.13%, 12.9% and 22.8% of current habitable area respectively. This information can serve as a  
31 useful predictor of potential HAT and AAT hotspots and inform surveillance strategies.  
32 Distribution maps generated by this study can be useful in guiding tsetse fly control managers,  
33 health, livestock and wildlife officers when setting surveys and surveillance programs. The maps  
34 can also inform protected area managers potential encroachment due to shrinkage of tsetse fly  
35 habitats in the protected area.

36 **Key Words:** *Climate change, Maasai Steppe, tsetse fly, MaxEnt, SDM,*

37 **Authors' summary**

38 Spatial variation of African Trypanosomiasis burden depends on distribution of biotopes  
39 necessary for tsetse flies to thrive. Therefore, mapping the occurrence of the tsetse fly species is a  
40 useful predictor of African Trypanosomiasis transmission risk areas. Climate is a major  
41 determining factor for occurrence and survival of tsetse fly, the vector responsible for both HAT  
42 and AAT. Since resources for prevention and control of tsetse fly species and the disease they  
43 transmit are generally scarce in endemic settings, understanding potential impacts of climate

44 change on tsetse fly species distribution in space and time is essential for informing coherent  
45 strategies for vector and disease control at a local scale.

## 46 **Introduction**

47 Most climate change predictions show an upward trend in temperature for at least the next  
48 nine decades [1], but there is uncertainty with different climate models predicting different  
49 magnitudes of warming. On average, global temperature is expected to rise by 0.8-2.6<sup>0</sup>C and by  
50 1.5-3<sup>0</sup>C in Africa by the year 2050 [2]. Such increases have potential to cause species habitat  
51 modification including range expansion or contraction in addition to altering their relationships  
52 with bio-physical environment. The influence of climate change on species distribution is  
53 supported by evidence from fossil records [3] and observed trends from the twentieth to twenty  
54 first centuries on species range shifts. For example, it is estimated that a change in 1<sup>0</sup>C will lead  
55 to range shifts of 160km of ecological zone on earth, implying that if the globe will warm by 3<sup>0</sup>C  
56 by the year 2100, the flora and fauna of the North Pole will move approximately 480 km northward  
57 to remain within their thermal tolerances [4-5]. Some species of butterflies in Europe have been  
58 reported to shift further north as those zones become more habitable [6-8]. Predicted rise in  
59 temperature is also expected to transform dynamics of vector-borne diseases including African  
60 Trypanosomiasis, either, by altering the vectors and pathogens geographical range, or their  
61 development and mortality rates [9-12].

62 Tsetse fly occurs in Sub-Saharan Africa and their distribution is influenced by climate,  
63 vegetation and hosts. Climate, particularly temperature is considered a major driver as it influences  
64 all others factors that determine tsetse occurrence. Trypanosomiasis remains a debilitating and  
65 fatal disease to livestock and humans, if left untreated. For instance, trypanosomiasis in livestock



66 causes loss of over 4 billion USD due to 70% reduction of cattle density, 50% reduction in diary  
67 and meat sales, 20% reduction in calving rates, and 20% increases in calf mortality in Sub-Saharan  
68 Africa [13]. In Tanzania, tsetse fly occurs in over 65% of rangeland savannah ecosystems [14],  
69 exposing about 4 million people in rural communities to the risk of sleeping sickness and causing  
70 loss of approximately eight million USD annually due to nagana induced low livestock  
71 productivity [15-17]. Since dynamics of African trypanosomiasis is a function of tsetse fly  
72 competence, and the ecology and behavior of available hosts, spatial variation of disease burden  
73 depending on the distribution of biotopes necessary for tsetse flies to thrive is expected.

74 Trends in climate change and associated socioeconomic transformation is anticipated to  
75 continue altering tsetse fly habitats in Tanzania rangelands. Nonetheless, empirical evidence to  
76 support the assertion about change in tsetse fly species distribution as a result of climate change is  
77 lacking in the country. Also, information that could aid tsetse control planning for future  
78 preparedness is rare to find in the country and absent at local scales. In the Maasai Steppe, for  
79 instance, knowledge on tsetse fly spatial variation is often based on old and course data and not  
80 publicly available.

81 Various scientific approaches have been used to understand the potential impacts of climate  
82 on spatial and temporal distribution of disease vectors. Some of the approaches include climate  
83 envelope models and correlations between climatic variables and vectors [18-21]. Climate  
84 envelopes are species distribution models that use climate data to define climate suitability for  
85 species to occur [22]. Specifically, these models rely on statistical correlations between species  
86 distributions points and their associated climate parameters to define a species' envelope of  
87 tolerance around existing ranges thereby delineating a 'climate envelope' within which species

88 thrive [19;22]. Compared to mechanistic models, climate envelope models do not incorporate data  
89 other than occurrence and environmental related data; so they do not predict fitness variation across  
90 climate gradients [23].

91         There have been research that studied risk of African Trypanosomiasis and tsetse fly  
92 burden in the Maasai Steppe [24-31]. However, none of these established potential impacts of  
93 climate change on distribution of tsetse. To fill this gap, a general question on what is the potential  
94 impact of climate change on the distribution of common *Glossina* species found in the study area  
95 was investigated. This study adopted a general definition of climate envelopes in which models were  
96 built using climate variables to define areas that have suitable climate for the tsetse fly and model their  
97 distribution based on current climate under which they have been observed. Prediction for future  
98 distribution was carried out to understand how African Trypanosomiasis transmission hotspots  
99 might change under future climate scenarios. This information may help stakeholders to allocate  
100 scarce resources in preventing African Trypanosomiasis by implementing more targeted  
101 interventions. This study also may form a basis for a large national and regional scale prediction  
102 of future African Trypanosomiasis transmission hotspots.

## 103 **Methodology**

### 104 **Study area**

105         This study was carried out in the Tanzania Maasai Steppe, located between 1.5 to 5° South  
106 latitude and 35 to 37° East Longitude (Fig 1). It covers an area of more than 60,000 km<sup>2</sup> with a  
107 population of over 600,000 people, mainly practicing pastoralism and to a lesser extent, agro-  
108 pastoralism. The region is semi-arid and a human-wildlife-livestock system, receiving up to 500  
109 mm of rainfall per annum. Rainfall patterns dictate movement of pastoralists and their herds and

110 wildlife in search for water and pastures. These movements increases the likelihood of disease  
111 transmission between domestic animals, people and wildlife [3].

## 112 **Data Collection**

### 113 **Species occurrence and background data**

114 This study targeted three *Glossina* species *G.m.morsitans*, *G.pallidipes* and *G. swynnertoni*  
115 commonly found in the Maasai Steppe [27, 28, 29]. Abundance data were collected through  
116 entomological field surveys carried out once in the dry season, November 2015 and once in the  
117 wet season, May 2016. A total of 99 baited epsilon traps [33] were placed in Simanjiro and  
118 Monduli districts. Traps were deployed in stratified random subsampling of the major vegetation  
119 types [34] at a distance of at least 200m apart [16, 33]. At each trapping site, numbers of tsetse  
120 flies caught and geographical coordinates were recorded using hand-held Global Positioning  
121 System (GPS). The collected abundance data was converted to presence data for each of the GPS  
122 locations, yielding a total of 32, 59 and 29 unique occurrence points for *G.m.morsitans*, *G.*  
123 *pallidipes* and *G. swynnertoni*, respectively, after eliminating duplicate records resulted from  
124 multiple entries for a particular season. Duplicate records were removed using ecological niche  
125 modelling tools (ENMTools) software version 1.4.3 [35]. The occurrence data were used with  
126 climate predictor variables as input in MaxEnt (v 3.3.3k) [36], to create climate envelope models  
127 for the three species. MaxEnt is a species distribution model developed to work with presence-  
128 only data, and has been widely used in modelling and mapping species distributions [37], including  
129 to predict the probability of occurrence of species across space and time in areas that have not been  
130 sampled [36, 38]. Since dispersal of tsetse flies is dependent on availability of suitable hosts, and  
131 the study area is home to numerous hosts (wildlife and livestock), the study assumed that all

132 districts of Maasai Steppe were potential for attracting tsetse flies. For this reason, background  
133 data were sampled from the whole study area [38-40].

#### 134 **Climate layers**

135 Predictive models for tsetse fly species distribution were made using the occurrence data  
136 and current climate variables (Table 1). The initial candidate layers considered in the model were  
137 elevation, precipitation of the wettest month (April), mean maximum temperature of the warmest  
138 month (February), mean maximum temperature of the driest month (September) and mean  
139 minimum temperature of the coldest month (July). Both maximum and minimum temperature  
140 affects tsetse fly activity patterns and plays an important role in determining the development of  
141 tsetse flies and **trypanosomes at each life stage** [41-42]. Since blood meals is the only known tsetse  
142 fly nutrition, **no information is known on effects of precipitation on tsetse fly species** except reports  
143 that indicate fluctuation of abundance during rainy season [25, 27, 43, 44]. However, it is thought  
144 that rainfall, apart from maintaining vegetation and humidity for tsetse fly to thrive, it also affects  
145 tsetse fly species indirectly by causing local flooding which may drown pupae that are buried in  
146 loose soil [45] and so it was included in predictor variables. Elevation, which is a proxy for  
147 temperature, was also used as a predictor variable in order to gain insight regarding the potential  
148 altitude limit for tsetse fly species to thrive. Although land cover/use, density of animals also  
149 influence tsetse fly distribution in space and time [16], this information was not included in the  
150 study due to inconsistency of available data. Models created using current climate variables were  
151 mapped on to future climate layers to understand how changing climate might influence tsetse  
152 distribution and thereby African Trypanosomiasis transmission risk. For the future climate  
153 projection scenario (year 2050), this study used 833.33m resolution Coupled Model Inter-  
154 comparison Project (CMIP5) global circulation model (GCM).

155 **Table 1:** Candidate covariates tested used in initial model runs, and the bolded ones used in the  
 156 best-performing MaxEnt models

| Variable                                                     | Type       | Units                   | Resolution | source                                                          |
|--------------------------------------------------------------|------------|-------------------------|------------|-----------------------------------------------------------------|
| <b>Precipitation of the wettest month (April)</b>            | Continuous | ml                      | 833.33m    | <a href="http://www.worldclim.org">http://www.worldclim.org</a> |
| <b>Mean maximum temperature of the warmest month (April)</b> | Continuous | $^{\circ}\text{C} * 10$ | 833.33m    | <a href="http://www.worldclim.org">http://www.worldclim.org</a> |
| <b>Mean minimum temperature of the coolest month (July)</b>  | Continuous | $^{\circ}\text{C} * 10$ | 833.33m    | <a href="http://www.worldclim.org">http://www.worldclim.org</a> |
| <b>Altitude/elevation</b>                                    | Continuous | m                       | 833.33m    | <a href="http://www.worldclim.org">http://www.worldclim.org</a> |
| Mean maximum temperature of the driest month (September)     | Continuous | $^{\circ}\text{C} * 10$ | 833.33m    | <a href="http://www.worldclim.org">http://www.worldclim.org</a> |

157

158 Of the many possible GCMs to use, CMIP5 was chosen because the CMIP5 models are  
 159 relatively more advanced (fine-tuned) and they use RCP scenario compared to previous GCMs  
 160 that were released in or before 2010. In particular, the climate system model from Beijing Climate  
 161 Center (BCC-CSM1-1) was used and the RCP 4.5 was selected for this study. The BCC-CSM1  
 162 was chosen for this analysis because it's **is** among the models that have been suggested to capture  
 163 the key processes relevant to our study area [46]. Although there is uncertainty associated with  
 164 any future climate scenario, these data provide reasonable predictions that can be useful for  
 165 planning.

## 166 **Modelling procedures**

167 In order to minimize the use of correlated variables that may mask contribution of  
 168 individual variables and cause difficulties in results interpretation [37, 47], pairwise collinearity  
 169 tests of predictor variables was performed using ENMTool 1.4.3 [35-36]. Temperature variables  
 170 and altitude were highly correlated but mean minimum and maximum temperature of coldest and

171 warmest month respectively were maintained because of their high biological relevance to tsetse  
172 fly species [43]. Altitude was also forced in the model to gain insights regarding the elevation  
173 limits of tsetse fly species distribution. Mean maximum temperature of the driest month was  
174 omitted from analysis because of the relatively lower knowledge of biological values of dryness  
175 to tsetse fly.

176 MaxEnt was used to model the probability of species occurrence based on unique occurrence  
177 points [36-38]. Sample bias file was excluded in the model with the assumption that tsetse flies  
178 are likely to be present in large part of the study area due to widely spread of hosts [17; 48].  
179 Because there were more than 15 occurrence points, MaxEnt was run using linear, quadratic and  
180 hinge features [49]. The model was set to run with 500 iterations and 10 replicates with default  
181 parameters regularization and the jackknife estimates (measure of variable influence).

## 182 **Model assessment**

183 Four variables were included in MaxEnt along with the occurrence data. An initial SDM  
184 was run in MaxEnt (one run; raw output setting) to acquire lambda values used in ENMTools  
185 v.1.4.3 [35] to calculate Akaike's Information Criterion (AICc; AIC and Bayesian information  
186 Criterion (BIC) [50] for a model fit with four, three and two variables, respectively (Table 2). This  
187 method selects the most parsimonious model. The model that was most parsimonious in this study  
188 (lowest AIC, AICc, BIC and high area under the receiver operating curve (AUC) value) had all  
189 four variables. The best model for each species was validated using 10-fold cross-validation, with  
190 the averages of 10 model runs representing the final output. Model performance as well as the  
191 contribution of predictor variables were assessed by using AUC and variable importance was  
192 assessed using the relative gain contribution of each variable and jackknife tests compared using

193 AUC, test gain and regularized training gain. Marginal and single variable response curve were  
 194 used to depict the relationship between tsetse fly species and predictor variables. Final outputs  
 195 included predictive maps of the probability of tsetse fly species presence based on climate  
 196 suitability. The probability scores (numeric values between 0 and 1) were displayed in ArcGIS 10.5  
 197 to show the current and future habitat suitability for each of the three tsetse fly species.

## 198 Results

### 199 Model selection

200 The distribution models for each tsetse fly species performed better than base/random  
 201 (AUC > 0.5). The model that included all four predictor variables had the best fit (Table 2). The  
 202 results presented in all subsequent sections are based on this model.

203 **Table 2:** Model performance based on AUC, AIC, AICc and BIC values for tsetse fly species  
 204 occurrence and different combinations of the environmental variables.

| Species              | Model assess ment | Tmax of warmest month<br>Tmin of coldest month | Precipitation of the wettest month<br>Tmax of warmest month<br>Tmin of coldest month | Altitude<br>Precipitation of the wettest month<br>Tmax of warmest month<br>Tmin of coldest month |
|----------------------|-------------------|------------------------------------------------|--------------------------------------------------------------------------------------|--------------------------------------------------------------------------------------------------|
| <i>G.m.morsitans</i> | <i>AUC</i>        | 0.850                                          | 0.902                                                                                | 0.938                                                                                            |
|                      | <i>AIC</i>        | 702.78                                         | 667.27                                                                               | 625.79                                                                                           |
|                      | <i>AICc</i>       | 709.04                                         | 680.47                                                                               | 642.21                                                                                           |
|                      | <i>BIC</i>        | 714.51                                         | 683.39                                                                               | 643.38                                                                                           |
| <i>G. pallidipes</i> | <i>AUC</i>        | 0.818                                          | 0.919                                                                                | 0.959                                                                                            |
|                      | <i>AIC</i>        | 1302.59                                        | 1198.26                                                                              | 1108.75                                                                                          |
|                      | <i>AICc</i>       | 1304.79                                        | 1202.85                                                                              | 1115.54                                                                                          |
|                      | <i>BIC</i>        | 1317.13                                        | 1219.04                                                                              | 1133.68                                                                                          |
| <i>G.swynnertoni</i> | <i>AUC</i>        | 0.840                                          | 0.854                                                                                | 0.899                                                                                            |
|                      | <i>AIC</i>        | 624.99                                         | 614.66                                                                               | 576.83                                                                                           |
|                      | <i>AICc</i>       | 630.32                                         | 626.88                                                                               | 601.09                                                                                           |

**205 Variable contribution and climate suitability map for *G. m morsitans***

206 Altitude accounted for more than one third (35.1%) of the variation in climate suitability  
207 model for *G. m. morsitans* occurrence, followed by precipitation of the wettest month (32.1%),  
208 maximum temperature of the warmest month (22.3%), and minimum temperature of the coldest  
209 month (10.6%). Based on 10 percentile training presence logistic threshold (10% minimum  
210 threshold), the model showed that current suitable climate for *G.m.morsitans* covers 32% (19,225  
211 km<sup>2</sup>) of the entire Maasai Steppe ( $\approx 60,000$  km<sup>2</sup>) and in the future (year 2050) the model indicated  
212 the suitable area will shrink to 7.4% (4,447.34 km<sup>2</sup>) of the current suitable area in the Maasai  
213 Steppe (Fig 2 and 3).

214

215 Variable response curves indicated that the probability of occurrence of *G.m.morsitans*  
216 drops off dramatically above 1000m of altitude when all variables are included in the model, but  
217 a very peaked response to altitude  $\approx 1200$ msl and almost no probability of occurrence above  
218 2500msl when that is the only variable considered (Supplementary 1 a and Supplementary 2 a).  
219 Marginal and single variable response curves were however similar for precipitation of the  
220 wettest month, showing a preference (probability of presence  $\geq 0.6$ ) for precipitation between  
221 140-230mm per month, and almost no chance of occurrence below 100mm/month or above  
222 350mm/month (Supplementary 1 b and Supplementary 2 b). The probability of occurrence of  
223 *G.m.morsitans* drops off dramatically above 28<sup>0</sup>C maximum temperature when all variables are  
224 included in the model, but, a peaked response to maximum temperature of  $\approx 28^{\circ}$ C for the mean  
225 maximum temperature of the warmest month, with minimal chances of occurrence below 15<sup>0</sup>C



226 or above 32<sup>0</sup>C maximum temperature values when used as the only single variable in the model  
227 (Supplementary 1 c and Supplementary 2 c).

228 The probability of occurrence of *G.m.morsitans* drops off dramatically above 14<sup>0</sup>C  
229 minimum temperature when all variables are included in the model, reaching the peak response at  
230 a minimum temperature of  $\approx 13^{\circ}\text{C}$  for the mean minimum temperature of the coldest month with  
231 rare chances of occurrence below 0<sup>0</sup>C or above 16<sup>0</sup>C minimum temperature when used as the only  
232 variable (Supplementary 1 d and Supplementary 2 d).

### 233 **Variable contribution and climate suitability map for *G. pallidipes***

234 Precipitation of the wettest month accounted for almost two-third (60.4%) of the  
235 variation in habitat suitability, followed by altitude (23.0%) and maximum temperature of the  
236 warmest month (16.6%). Based on 10 percentile training presence logistic threshold, the model  
237 showed that current suitable habitat for *G.pallidipes* covers 11% (7113 km<sup>2</sup>) of the Maasai  
238 Steppe and by 2050, the model indicated only 918 km<sup>2</sup> with suitable habitat for this species (Fig  
239 4 and 5).

240 Variable response curves indicated that the probability of occurrence of *G.pallidipes* drops  
241 off dramatically above 1,000m of altitude when all variables are included in the model, reaching  
242 its peak response at altitude  $\approx 1,200\text{msl}$  and almost no probability of occurrence above 3,000msl  
243 when that is the only variable considered in the model (Supplementary 3 a and Supplementary 4  
244 a). Marginal and single variable response curves were similar for precipitation of the wettest  
245 month, showing a preference (probability of presence  $\geq 0.6$ ) for precipitation between 140-180ml  
246 per month, and almost no chance of occurrence below 120mm/month or above 330mm/month  
247 (Supplementary 3 b and Supplementary 4 b). The probability of occurrence of *G.pallidipes* drops

248 off dramatically above 28<sup>0</sup>C maximum temperature when all variables are included in the model,  
249 and a peak response was observed at a maximum temperature of  $\approx 28^0\text{C}$  for the mean maximum  
250 temperature of the warmest month, and almost no chance of occurrence below 10<sup>0</sup>C or above 34<sup>0</sup>C  
251 maximum temperature when used as the only variable (Supplementary 3 c and Supplementary 4  
252 c). The probability of occurrence of *G.pallidipes* drops off dramatically above 10<sup>0</sup>C minimum  
253 temperature when all variables are included in the model, but, a very peaked response to minimum  
254 temperature of  $\approx 13^0\text{C}$  for the mean minimum temperature of the coldest month and almost no  
255 chance of occurrence below -5<sup>0</sup>C or above 17<sup>0</sup>C minimum temperature when used as the only  
256 variable (Supplementary 3 d and Supplementary 4 d).

257  
258         Precipitation of the wettest month provided the best fit to the training data when used in  
259 isolation. This variable also appears to have the most information that is not present in the other  
260 variables, as it decreases the gain the most when it is omitted. Yet, precipitation of the wettest  
261 month indicated the best fit to the test data and best predicted the distribution of the *G. pallidipes*  
262 test data.

### 263 **Variable contribution and climate suitability map for *G. swynnertoni***

264         Altitude contributed almost a half (47.5%) of the variation in climate suitability for *G.*  
265 *swynnertoni* occurrence, followed by precipitation of the wettest month (27.4%), minimum  
266 temperature of the coldest month (22%), and maximum temperature of the warmest month (3.1%).  
267 Based on 10 percentile training presence logistic threshold, it was revealed that, current suitable  
268 climate for *G. swynnertoni* covers 32,335 km<sup>2</sup>, but is predicted to shrink to 7,374km<sup>2</sup> by the year  
269 2,050 (Fig 6 and 7).

270 Variable response curves indicated that the probability of occurrence of *G.swynnertoni*  
271 drops off dramatically above 1000m of altitude when all variables are included in the model but a  
272 very peaked response to altitude  $\approx$ 1300msl and almost no probability of occurrence above 2500msl  
273 when that is the only variable considered (Supplementary 5 a and Supplementary 6 a). Variable  
274 response curves indicated that the probability of occurrence of *G.swynnertoni* drops off  
275 dramatically above 140ml of rainfall when all variables are included in the model, but a very  
276 peaked response to precipitation  $\approx$ 160ml for the precipitation of the wettest month and almost no  
277 probability of occurrence above 400ml/month or below 90ml/month when that is the only variable  
278 considered (Supplementary 5 b and Supplementary 6 b). The probability of occurrence of  
279 *G.swynnertoni* drops off dramatically above 28<sup>0</sup>C maximum temperature when all variables are  
280 included in the model, but, a peaked response to maximum temperature of  $\approx$  28<sup>0</sup>C for the mean  
281 maximum temperature of the warmest month, and almost no chance of occurrence below 10<sup>0</sup>C or  
282 above 34<sup>0</sup>C maximum temperature when used as the only variable (Supplementary 5 c and  
283 Supplementary 6 c).

284 The probability of occurrence of *G.swynnertoni* drops off dramatically above 14<sup>0</sup>C  
285 minimum temperature when all variables are included in the model. The peak probability was  
286 observed at a minimum temperature of  $\approx$  14<sup>0</sup>C for the mean minimum temperature of the coldest  
287 month with reduced chances of occurrence below 0<sup>0</sup>C or above 16<sup>0</sup>C minimum temperature when  
288 used as the only variable (Supplementary 5 d and Supplementary 6 d).

289 The best fit to the *G.swynnertoni* training data was provided by altitude when used by itself.  
290 Altitude indicated the best fit to the test data and best predicted the distribution of the *G*  
291 *swynnertoni* test data. Also, omission of this variable decreases the gain the most, meaning altitude  
292 had most information that is not present in other variables.

## 293 Discussion

294 Tsetse fly occurrence poses public health challenges and exacerbates economic hardships  
295 due to the investment needed to control tsetse flies and treat the diseases they transmit. Since  
296 climate is the dominant factor that determines tsetse fly occurrence, and the resources for  
297 controlling tsetse and trypanosomiasis are scarce, understanding how the changes in climate at  
298 local scale affects the spatial and temporal distribution of tsetse fly species is critical in identifying  
299 the most likely vulnerable places, and better targeting limited resources. The SDM used in this  
300 study provides useful information for public health, livestock development stakeholders and  
301 wildlife managers to plan for future potential climates effects across space and time.

302 This study used MaxEnt species distribution modelling to understand the influence of  
303 altitude and climate variables on tsetse fly species occurrence, and make predictions about future  
304 distribution based on predictive climate models. The models yielded current and future potential  
305 climate distribution maps for *G. m. morsitans*, *G.pallidipes* and *G. swynnertoni*, and predicted an  
306 overall reduction in the area of the Maasai Steppe that will have suitable climate for the three  
307 *Glossina* species. Prediction also indicated probability of these three tsetse fly species to inhabit  
308 relatively higher latitude by mid-century. Compared to current conditions, in the year 2050, area  
309 with suitable climate will decline to 23.13%, 12.9% and 22.8% of current suitable area for *G. m.*  
310 *morsitans*, *G.pallidipes* and *G.swynnertoni*, respectively. The reason for this could be explained  
311 by the temperature response curves, which indicated 34<sup>0</sup>C mean maximum temperature of the  
312 warmest month and 17<sup>0</sup>C mean minimum temperature of the coldest month to be maximum upper  
313 and lower temperature thresholds for these three species. The range reduction across the Maasai  
314 Steppe can be attributed to future climates exceeding these thresholds whereby, by mid of the

315 century, maximum temperature is expected to have risen by 1.7<sup>0</sup>C in the Maasai Steppe [46]. The  
316 temperature thresholds that limit tsetse fly distribution and abundance has also been shown in other  
317 studies from the Maasai Steppe, based on intensive longitudinal sampling over smaller geographic  
318 areas [27]. These observations complement the suggestion that climate change in some parts of  
319 East Africa would result in overall reduction of habitat suitability range for tsetse flies, but also a  
320 spread out of suitable range particularly in high-altitude areas that currently are less suitable for  
321 the species due to low temperatures [18]. Hulme, also predicted a contraction of *G. m.morsitans*  
322 geographic range owing to climate change expected to affect the SADC region [51]. Influence of  
323 climate on the distribution of *Glossina species* has been explained in the previous studies [41, 42,  
324 55] and *G. m.morsitans*, *G. pallidipes* and *G.swynnertoni* are among groups of tsetse flies whose  
325 relative abundance tends to decrease with high temperature. Our model forecasts suitable area for  
326 all three species that will shrink in the Maasai Steppe by 2050 under RCP 4.5, suggesting  
327 populations of these species may crash or may adapt to increasing maximum temperatures by  
328 moving upward in elevation. In fact, the models predicted a suitable altitude for *G. m.morsitans*,  
329 *G.pallidipes* and *G. swynnertoni* from around 1,000msl currently observed, to around 2,500m,  
330 3,000m and 2,500m elevation, respectively, indicating these species may become problematic in  
331 high altitude ecosystems of the study area, if other ecological requirements for these species will  
332 be met in those habitats.

333         The importance of the four variables that were selected through our parsimony analysis to  
334 the ecology of the three *Glossina* species indicates the importance of careful scrutiny of available  
335 environmental data for a study site of interest. Although there was variation in variable  
336 contribution to specific species model, mean maximum temperature of the warmest month and  
337 mean minimum temperature for the coldest month indicated similar response curves. Specifically,

338 mean maximum temperature of the warmest month, and mean minimum temperature of the coldest  
339 month have relevant ecological importance to the distribution of tsetse fly species. For example,  
340 the logistic probability response curves indicated higher maximum temperature of the warmest  
341 month and higher minimum temperature of the coldest month decreases likelihood of all three  
342 *Glossina* species occurrence, likely because, both low and high temperatures affect development  
343 of all two tsetse species at various life stages [41]. Effects of hotter and colder environments on  
344 various developmental stages of tsetse fly species has also been reported [56-57].

345         Logistic probability response curves indicated that higher precipitation during the wettest  
346 month decreases the likelihood of occurrence of the three *Glossina* species considered in this study.  
347 Generally, no record is known on direct effect of rainfall on tsetse fly, but, it is thought that high  
348 rainfall may cause local flooding which may wash out pupae that are buried in loose soil, leading  
349 to tsetse fly depopulation and thus low probability of occurrence. Although responses to this  
350 variable indicated similar trend in all three species, the importance of the variable in models for  
351 the different species varied dramatically. For example, precipitation of wettest month contributing  
352 60.4% of the relative gain to the *G. pallidipes* model and providing the best fit to the model,  
353 indicating that the species can respond differently to the climate variables. In particular,  
354 precipitation in the wettest month may be more important to the distribution of *G. pallidipes* owing  
355 to the species' ecology. *G. pallidipes* is strongly associated with wetter habitats, and so relatively  
356 hydrophilic, unlike *G.m.morsitans* and *G. swynnertoni*.

357         In all three tsetse fly species models, altitude had a relatively high contribution to the model  
358 gain, but did not necessarily provide the best fit to the training model. For example, altitude  
359 contributed 35.1% of relative gain to the *G.m. morsitans* model and 23% for *G. pallidipes*

360 respectively. However, the best fit to the training models for these two species were provided by  
361 mean maximum temperature of the warmest month and precipitation of the wettest month. This  
362 may be because temperature and rainfall have more biological relevance to tsetse flies compared  
363 to altitude. Although altitude indicated high contribution (47.5%) to the *G. swynnertoni* model and  
364 also had the best fit, it should however be noted that all occurrence points were obtained at a  
365 relatively lower altitudes and this might have influenced the results. Nevertheless, all *Glossina*  
366 species responded similarly to altitude, with response curves for all species indicating low  
367 preference for higher altitude. This is because higher altitudes are characterized by lower  
368 temperature that affects tsetse fly development [42]. Given that altitude and temperature were  
369 highly correlated, it was initially considered that by including altitude in the model, it could have  
370 masked the contribution of variables with greater biological relevance [37]. However, because  
371 relationships between tsetse flies and temperature are well-established [41,42,58,59], altitude was  
372 included in the models in order to gain insight into how tsetse fly species are likely to expand their  
373 range to higher elevations under future increases in temperature.

374 Extrapolated over larger areas, our findings could indicate either increases or decreases in  
375 suitable tsetse range. Likewise, predictions of climate impacts of tsetse distribution in Africa do  
376 not all agree. Some studies have suggested that climate change in some parts of East Africa would  
377 result in a spreading out of suitable range for tsetse flies particularly in high-altitude areas that  
378 currently exclude the species due to low temperatures, but also there is a chance of range  
379 contraction of tsetse flies in some location [18]. Other reports have suggested a decline in the  
380 distributional range of tsetse fly species owing to climate change. Furthermore, it should be noted  
381 that climate variables are not the sole predictors of future tsetse distribution. Other factors such as  
382 host availability and suitable vegetation will also influence where tsetse are found, but are more

383 difficult to model into the future. Distribution maps based on relationships with climate variables  
384 can therefore be considered to be maximum potential distributions.

385         Although the findings of this study are based on only a single GCM model, BCC-CSM1-1  
386 from CMIP5, it is considered to have better predictive capacity because it uses RCP and at a  
387 relatively finer resolution of about 1km. The fact that these findings agree with previous findings  
388 reported by Rodgers and Randolph [50] and Hulme [51] that used relatively older GCM version,  
389 increase the confidence that climate is more likely to push distribution of tsetse flies into new  
390 areas, while removing it from others. For this reason, maps produced by this study can improve  
391 the efficiency and lower the cost of future surveillance. Also, the methods employed by this study  
392 can be adopted to generate high resolution species distribution maps under current and future  
393 climate scenarios for larger areas and for other vectors that pose threats to both public health and  
394 economic development. Tsetse fly control managers can incorporate the maps created from these  
395 models into integrated pest management regimes, and further tailor them based on what is already  
396 known about Maasai Steppe. Finally, maps such as these may be displayed to the public to increase  
397 awareness of climate change implications in the Maasai Steppe and other areas that are tsetse  
398 infested. These maps can as well inform protected areas managers of the likely encroachment due  
399 to shrinkage of tsetse fly habitats even in protected areas.

400         Limitation of this study include the fact that the study approach was climate envelope  
401 models which does not predict the expected ability/fitness of tsetse fly to adapt to the climate  
402 change. Inclusion of other ecological requirement variables would improve the prediction of  
403 general habitat suitability other than only climate suitability.



404 **References**

- 405 1. Meehl GA, Stocker TF, Collins WD, Friedlingstein P, Gaye AT, Gregory JM, Kitoh A, Knutti  
406 R, Murphy JM, Noda A, Raper SCB, Watterson IG, Weaver AJ, Zhao ZC. Global Climate  
407 Projections. In: Solomon S, Qin D, Manning M, Chen Z, Marquis M, Averyt KB, Tignor M, Miller  
408 HL, editors. *Climate Change 2007: The Physical Science Basis. Contribution of Working Group I*  
409 *to the Fourth Assessment Report of the Intergovernmental Panel on Climate Change: 2007.* pp.  
410 747-846.
- 411 2. UNEP Fact sheet: Climate change in Africa - what is at stake? 2007 Dec 15 [Cited 2019 March  
412 15] Available from: [http://www.unep.org/roa/amcen/docs/AMCEN\\_Events/climate-](http://www.unep.org/roa/amcen/docs/AMCEN_Events/climate-change/2ndExtra_15Dec/FACT_SHEET_CC_Africa.pdf)  
413 [change/2ndExtra\\_15Dec/FACT\\_SHEET\\_CC\\_Africa.pdf](http://www.unep.org/roa/amcen/docs/AMCEN_Events/climate-change/2ndExtra_15Dec/FACT_SHEET_CC_Africa.pdf).
- 414 3. Davis MB, Shaw RG. Range shifts and adaptive responses to Quaternary climate change.  
415 *Science*. 2001 Apr 27 Vol292: 673-679. [https://doi: 10.1126/science.292.5517.673](https://doi.org/10.1126/science.292.5517.673)
- 416 4. Thuiller W, Biodiversity: climate change and the ecologist. *Nature*. 2007 August 2Vol 448: 550-  
417 552. <https://doi.org/10.1038/448550a>
- 418 5. Thuiller W, Albert CH, Araújo MB, Berry PM, Cabeza M, Guisan G, Hickler T, Midgley GF,  
419 Paterson J, Schurr FM, Sykes MT, Zimmermann NE. Predicting global change impacts on plant  
420 species' distributions: Future challenges. *Perspect. Plant. Ecol. Evol. Syst.* 2008 Vol 9:137-152.
- 421 6. Konvicka M, Maradova M, Benes J, Fric Z, Kepka P. Uphill shifts in distribution of butterflies  
422 in the Czech Republic: Effects of changing climate detected on a regional scale. *Glob. Ecol.*  
423 *Biogeogr.* 2003 Vol 12: 403-410.
- 424 7. Franco AMA, Hill JK, Kitschke C, Collingham YC, Roy DB, Fox R, Huntley B, Thomas CD.

425 Impacts of climate warming and habitat loss on extinctions at species' low- latitude range  
426 boundaries. *Global Change Biology*. 2006; 12 Vol 8:1545-1553. [https://doi.org/10.1111/j.1365-](https://doi.org/10.1111/j.1365-2486.2006.01180.x)  
427 [2486.2006.01180.x](https://doi.org/10.1111/j.1365-2486.2006.01180.x)

428 8. Hickling R, Roy DB, Hill JK, Fox R, Thomas CD (2006) The distributions of a wide range of  
429 taxonomic groups are expanding poleward. *Glob. Chang. Biol.* 2006 Vol 12:450-455.  
430 [https://doi: 10.1111/j.1365-2486.2006.01116.x](https://doi.org/10.1111/j.1365-2486.2006.01116.x)

431 9. Cook GC. Effect of global warming on the distribution of parasitic and other infectious  
432 diseases: a review. *J. R. Soc. Med.* 1992 Vol 85 (11): 688-691.

433 10. Gage KL, Burkot TR, Eisen, RJ, Hayes EB. Climate and Vectorborne Diseases. *Am J Prev*  
434 *Med.* 2008 Vol 35(5):436 – 450. [https://doi: 10.1016/j.amepre.2008.08.030](https://doi.org/10.1016/j.amepre.2008.08.030).

435 11. Mills JN, Gage KL, Khan AS. Potential Influence of Climate Change on Vector-Borne and  
436 Zoonotic Diseases: A Review and Proposed Research Plan. *Environ. Health Perspect.* 2010 Vol  
437 118(11):1507–1514. [https://doi: 10.1289/ehp.0901389](https://doi.org/10.1289/ehp.0901389)

438 12. Moore S, Shrestha S, Kyle TW, Vuong H. Predicting the effect of climate change on African  
439 trypanosomiasis: integrating epidemiology with parasite and vector biology. *J R Soc*  
440 *Interface.* 2012 May 7 Vol 9 (70):817-30. [https://doi: 10.1098/rsif.2011.0654](https://doi.org/10.1098/rsif.2011.0654).

441 13. Swallow BM. Impacts of trypanosomiasis on African agriculture. 1999 November 6 [Cited  
442 2019 March 30]. Available from:  
443 <http://citeseerx.ist.psu.edu/viewdoc/download?doi=10.1.1.631.6490&rep=rep1&type=pdf>

444 14. Malele II. Fifty years of tsetse control in Tanzania : challenges and prospects for the

445 future. *Tanzan J Health Res.* 2010 Vol 13:1-10.

446 15. Sindato C, Kimbita EN, Kibona SN. Factors influencing individual and community  
447 participation in the control of tsetse flies and human African trypanosomiasis in Urambo District  
448 , Tanzania. *Tanzan J Health Res.* 2008 Vol 10(1): 20–27.

449 16. Malele I, Nyingilili H, Msangi A. Factors defining the distribution limit of tsetse infestation  
450 and the implication for livestock sector in Tanzania. *Afr. J. Agric. Res.* 2010 Vol 6(10): 2341–  
451 2347.

452 17. Daffa J, Byamungu M, Nsengwa G, Mwambembe E, Mleche W. Tsetse distribution in  
453 Tanzania: 2012 status. *Tanzania Veterinary Journal.* 2013 Vol 28:12-20.

454 18. Rogers DJ, Packer MJ. Vector-borne diseases, models, and global change. *The Lancet* 1993 Vol  
455 342: 1282–1284.

456 19. Baker RHA, Sansford CE, Jarvis CH, Cannon RJC, MacLeod A, Walters KFA. The role of  
457 climatic mapping in predicting the potential geographical distribution of non-indigenous pests  
458 under current and future climates. *Agric. Ecosyst. Environ.* 2000 Vol 82(1–3):57–71.

459 20. Githeko AK, Lindsay SW, Confalonieri UE, Patz JA. Climate change and vector-borne  
460 diseases : a regional analysis. *Bull. World Health Organ.* 2000 Vol 78(9):1136-1347.

461 21. Watling JI, Romañach SS, Bucklin DN, Speroterra C, Brandt LA, Pearlstine LG, Mazzotti FJ.  
462 Do bioclimate variables improve performance of climate envelope models? *Ecol. Model.* 2012  
463 Vol 246:79-85.

464 **22.** Watling JI, Brandt LA, Mazzotti FJ, Romañach SS. *Use and Interpretation of Climate*  
465 *Envelope Models: A Practical Guide.* University of Florida: 2013

- 466 23. Kearney MR, Wintle BA, Porter WP. Correlative and mechanistic models of species  
467 distribution provide congruent forecasts under climate change. *Conserv Lett.* 2010 Vol 3:203-  
468 213.
- 469 24. Malele II, Kibone SN, Matemba LE, Sahani K, Swilla J, Mwalimu CD, Mayala BK, Kimaro  
470 E, Msumary C, Kalinga RB. Human African trypanosomiasis and challenges to its control in  
471 Urambo, Kasulu and Kibondo Districts, western Tanzania. *Tanzan J Health Res.* 2006 Vol 8: 80-  
472 85.
- 473 25. Sindato C, Malele I, Mwalimu C, Myingilili HS, Kaboya S, Kombe E, Msumary C, Manzoza  
474 A. Seasonal variation in human African trypanosomiasis in Tarangire National Park in Babati  
475 District, Tanzania . *Tanzan Health Res Bull.* 2007 Vol 9(2):2005–2008.
- 476 26. Salekwa LP, Nnko HJ, Ngonyoka A, Estes AB, Agaba M, Gwakisa PS. Relative abundance of  
477 tsetse fly species and their infection rates in Simanjiro, Northern Tanzania. *Livestock Research  
478 for Rural Development* 2014 Vol 26(12):1–8.
- 479 27. Nnko HJ, Ngonyoka A, Salekwa PL, Estes BA, Hudson PJ, Gwakisa PS, Cattadori IM.  
480 Seasonal variation of tsetse fly species abundance and prevalence of trypanosomes in the Maasai  
481 Steppe, Tanzania. *J Vector Ecol.* 2017 Vol 42(1):24-33. [https://doi: 10.1111/jvec.12236](https://doi:10.1111/jvec.12236).
- 482 28. Nnko, HJ, Gwakisa, PS, Ngonyoka A, Saigilu M, Ole-Neselle M, Kisoka W, Sindato C, Estes  
483 BA. Pastoralists’ vulnerability to trypanosomiasis in MaasaiSteppe. *EcoHealth.* 2017 November  
484 02 Vol 14(4):718-731. <https://doi:10.1007/s10393-017-1275-4> 29. Ngonyoka A, Gwakisa SP,  
485 Estes BA, Nnko JH, Hudson JP, Cattadori MI. Variation of tsetse fly abundance in relation to  
486 habitat and host presence in the Maasai Steppe, Tanzania. *J Vector Ecol.* 2017 Vol 42: 34-

- 487 43.[https:// doi: 10.1111/jvec.12237](https://doi.org/10.1111/jvec.12237)
- 488 30. Ngonyoka A, Gwakisa SP, Estes BA, Salekwa PL, Nnko, JH, Hudson JP, Cattadori MI.  
489 Patterns of tsetse abundance and trypanosome infection rates among habitats of surveyed villages  
490 in Maasai steppe of northern Tanzania. *Infect Dis Poverty*.2017 September 4 6(1):126. doi:  
491 10.1186/s40249-017-0340-0.
- 492 31. Ngongolo K, Estes AB, Hudson PJ, Gwakisa PS. Influence of Seasonal Cattle Movement on  
493 Prevalence of Trypanosome Infections in Cattle in the Maasai Steppe, Tanzania. *J Infect Dis*  
494 *Epidemiol* 2019 Vol 5:079. doi.org/10.23937/2474-3658/1510079
- 495 32. Kshatriya M, Kifugo S, Msoffe F, Neselle M, Said MY (2007). Novel Forms of Livestock and  
496 Wildlife Integration Adjacent To Protected Areas in Africa – Tanzania; Mapping Land Cover  
497 Changes in Simanjiro and Monduli Districts. International Livestock Research Institute. FAO  
498 Report on GEF Tanzania project. Rome (Italy): FAO 2002.
- 499 33. Hargrove JW, Holloway MTP, Vale GA, Gough AJE. Catches of tsetse (*Glossina* spp.)  
500 (Diptera: Glossinidae) from traps and targets baited with large doses of natural and synthetic host  
501 odour. *Bull Entomol Res*.1995 Vol 85: 215-227.
- 502 34. Bouyer J, Seck TM, Sall B, Ndiaye YE, Guerrini L, Vreysen JBM. Stratified Entomological  
503 Sampling in Preparation for an Area-Wide Integrated Pest Management Program: The Example  
504 of *Glossina palpalis gambiensis* (Diptera: Glossinidae) in the Niayes of Senegal, *J. Med.*  
505 *Entomol*. 2010 July 01 Vol 47(4):543–552.
- 506 35. Warren DL, Glor RE, Turelli M. ENMTools: a toolbox for comparative studies of  
507 environmental niche models, *Ecography* 2010 July 28 Vol 33: 607-611.

508 <https://doi.org/10.1111/j.1600-0587.2009.06142.x>

509 36. Phillips SJ, Anderson RP, Schapire RE. Maximum entropy modeling of species geographic  
510 distributions, *Ecol. Model.*2006 Vol 190: 231–259.

511 37. Elith J, Phillips SJ, Hastie T, Dudík M, Chee YE, Yates CJ. A statistical explanation of  
512 MaxEnt for ecologists. *Diversity Distrib.* 2011 Vol 17:43–57. [https://doi.org/10.1111/j.1472-](https://doi.org/10.1111/j.1472-4642.2010.00725.x)  
513 [4642.2010.00725.x](https://doi.org/10.1111/j.1472-4642.2010.00725.x)

514 38. Phillips SJ, Dudik M, Elith J, Graham CH, Lehmann A, Leathwick J, Ferrier S. Sample  
515 selection bias and presence-only distribution models: implications for background and pseudo-  
516 absence data. *Ecol Appl.* 2009 Vol 19: 181-197. <https://doi: 10.1890/07-2153.1>

517 39. Peterson AT, Soberón J, Pearson RG, Anderson RP, Martínez-Meyer E, Nakamura M, Araújo  
518 MB. Species' Occurrence Data. In: Levin SA, Horn HS editors. *Ecological niches and geographic*  
519 *distributions*. Princeton University Press, Princeton and Oxford. 2011.pp. 62-180.

520 40. Bradley BA. Predicting abundance with presence-only models, *Landsc. Ecol.*2016 Vol  
521 31(1):19–30. <https://doi.org/10.1007/s10980-015-0303-4>

522 41. Hargrove JW. Factors affecting density-independent survival of an island population of tsetse  
523 flies in Zimbabwe, *Entomol Exp Appl* 2001 Vol 100(2):151–164.

524 42. Hargrove JW. Tsetse population dynamics. In: *The Trypanosomiases*. Maudlin I, Holmes PH,  
525 MA editors. 2004 pp. 113-138.

- 526 43. Van Den Bossche P, De Deken R. Seasonal variations in the distribution and abundance of the  
527 tsetse fly, *Glossina morsitans morsitans* in eastern Zambia. *Med. Vet. Entomol.* 2002 June 01 Vol  
528 16(2):170–176. [https://doi: 10.1046/j.1365-2915.2002.00360.x](https://doi.org/10.1046/j.1365-2915.2002.00360.x)
- 529 44. Lukaw YS, Abdelrahman MM, Mohammed YO, Ochi EB, Elrayah IE. Factors influencing  
530 seasonal abundance of *Glossina fuscipes fuscipes* (*Glossina*: *Glossinidae*) in KajoKeji County,  
531 South Sudan, *Curr. Res. J. Biol. Sci.* 2014 Vol 6: 222-228.
- 532 45. Pollock JN. Training Manual for Tsetse Control Personnel: Volume 2, Ecology and Behaviour  
533 of Tsetse. FAO, Rome; 1982.
- 534 46. Jack C, Kloppers P. Provision of climate projections and analysis For the WHO/TDR Project  
535 B20280 “Predicting vulnerability and improving resilience of the Maasai communities to vector  
536 borne infections: an Eco-health approach in the Maasai Steppe ecosystem” University of Cape  
537 Town, South Africa. 2016.
- 538 47. Hijmans RJ, Elith J. Species distribution modeling with R Introduction. 2017 January 08  
539 [Cited 2018 April 22]. Available from:  
540 <http://cran.rproject.org/web/packages/dismo/vignettes/dm.pdf>.
- 541 48. Msoffe FU, Said MY, Ogutu JO, Kifugo SC, De JG, Paul VR, Robin S. Spatial correlates of  
542 land-use changes in the Maasai- Steppe of Tanzania : Implications for conservation and  
543 environmental planning, *Int. J. Biodivers. Conserv.* 2011 Vol 3:280-290.
- 544 49. Bateman BL, Vanderwal J, Johnson CN.. Nice weather for bettongs: Using weather events, not  
545 climate means, in species distribution models. *Ecography.* 2012 May 03 Vol 35(4):306–314.  
546 <https://doi.org/10.1111/j.1600-0587.2011.06871.x>

- 547 50. Anderson D, Burnham K. Avoiding pitfalls when using information-theoretic methods, *J Wildl*  
548 *Manage*: 2002 Vol 66(3): 912–918.
- 549 51. Hulme M. Climate Change and Southern Africa. An Exploration of Some Potential Impacts and  
550 Implications in the SADC Region. WWF International Climate Research Unit, Norwich.1996.
- 551 52. Rogers DJ, Randolph SE. Distribution and abundance of tsetse flies (*Glossina* spp.), *J Anim*  
552 *Ecol*.1986 Vol 55:1007–1025.
- 553 53. Rogers BDJ, Ki SIY, Packer MJ. Predicting the distribution of tsetse flies in West Africa using  
554 temporal Fourier processed meteorological satellite data, *Ann. Trop. Med. Parasitol*. 1996 Vol 90:  
555 225–241.
- 556 54. Moore N, Messina J. A landscape and climate data logistic model of tsetse distribution in  
557 Kenya, *PloS one* 2010 Vol 5(7) e11809. [https://doi:10.1371/ journal.pone.0011809](https://doi:10.1371/journal.pone.0011809).
- 558 55. Albert M, Wardrop NA, Atkinson PM, Torr SJ, Welburn SC. Tsetse Fly (*G.f. fuscipes*)  
559 Distribution in the Lake Victoria Basin of Uganda, *PLOS Negl. Trop. Dis*. 2015 Vol 9(4)  
560 e0003705. [https://doi:10.1371/ journal.pntd.0003705](https://doi:10.1371/journal.pntd.0003705)
- 561 56. Torr SJ, Hargrove JW. Behaviour of tsetse (Diptera: Glossinidae) during the hot season in  
562 Zimbabwe: the interaction of micro-climate and reproductive status, *Bull Entomol Res*. 1999 Vol  
563 89(4):365–379.
- 564 57. Terblanche JS, Clusella-Trullas S, Deere JA, Chown SL. Thermal tolerance in a south-east  
565 African population of the tsetse fly *Glossina pallidipes* (Diptera, Glossinidae): implications for  
566 forecasting climate change impacts, *J Insect Physiol*. 2008 Vol 54(1):114–27.
- 567 58. Rogers DJ. A general model for the African trypanosomiases. *J. Parasitol*. 1988 Vol 97 (1):



568 193–212.

569 59. Hargrove JW. The effect of ambient temperature on the flight performance of the mature male  
570 tsetse fly, *Glossina morsitans*, *Physiol Entomol.* 1980 Vol 5:397–400.

## 571 Supporting information Captions

### 572 Figures

573 **Fig 1:** An extract of map of Tanzania showing the study districts (Kiteto, Longido,  
574 Monduli and Simanjiro) forming the Maasai Steppe.

575 **Fig 2** Current climate suitability maps for the best performing model with the  
576 *G.m.morsitans* occurrence data, and all 4 environmental variables: elevation,  
577 precipitation of the wettest month (April), mean maximum temperature of the  
578 warmest month (February), and mean minimum temperature of the coldest month  
579 (July).

580 **Fig 3:** Midcentury (2050) climate suitability maps for the best performing model with the  
581 *G.m.morsitans* occurrence data, and all 4 environmental variables: elevation,  
582 precipitation of the wettest month (April), mean maximum temperature of the  
583 warmest month (February), and mean minimum temperature of the coldest month  
584 (July). In these figure we see that the probability of occurrence decreases with time  
585 (comparing current and midcentury) from the maximum values of 0.845 to 0.658,  
586 with contracted habitat

587 **Fig 4:** Current climate suitability map for the best performing model with the *G.pallidipes*  
588 occurrence data, including all 4 variables.

589 **Fig 5:** Midcentury (2050) climate suitability map for the best performing model with the  
590 *G.pallidipes* occurrence data, including all 4 variables. In these maps we see that  
591 the probability of occurrence decreases with time (comparing current and  
592 midcentury) from the maximum values of 0.919 to 0.725, with shrunk habitat

593 **Fig 6:** Current climate suitability maps for *G. swynnertoni*, for the model including all  
594 four predictor variables.

595 **Fig 7:** Midcentury (2050) climate suitability maps for *G. swynnertoni*, for the model  
596 including all four predictor variables. Similarly, in these maps indicate that the  
597 probability of occurrence decreases with time (comparing current and midcentury)  
598 from the maximum values of 0.826 to 0.715, with narrowing habitat  
599

### 600 Supplementary

601 **Supplementary 1:** a-d shows marginal response curves for the best performing model with  
602 *G.m.morsitans* occurrence data. Temperature is reported in  $^{\circ}\text{C} * 10$ .

603 **Supplementary 2:** a-d shows single variable response curves for the best performing model with  
604 *G.m.morsitans* occurrence data. Temperature is reported in  $^{\circ}\text{C} * 10$ .  
605

606 **Supplementary 3: a-d** shows marginal response curves for the best performing model with  
607 *G.pallidipes* occurrence data. Temperature is reported in  $^{\circ}\text{C} * 10$ .

608 **Supplementary 4: a-d** shows single variable response curves for the best performing model with  
609 *G.pallidipes* occurrence data. Temperature is reported in  $^{\circ}\text{C} * 10$ .

610 **Supplementary 5: a-d** shows marginal response curves for the best performing model with  
611 *G.swynnertoni* occurrence data. Temperature is reported in  $^{\circ}\text{C} * 10$ .

612 **Supplementary 6: a-d** single variable response curves for the best performing model with  
613 *G.swynnertoni* occurrence data. Temperature is reported in  $^{\circ}\text{C} * 10$ .

614

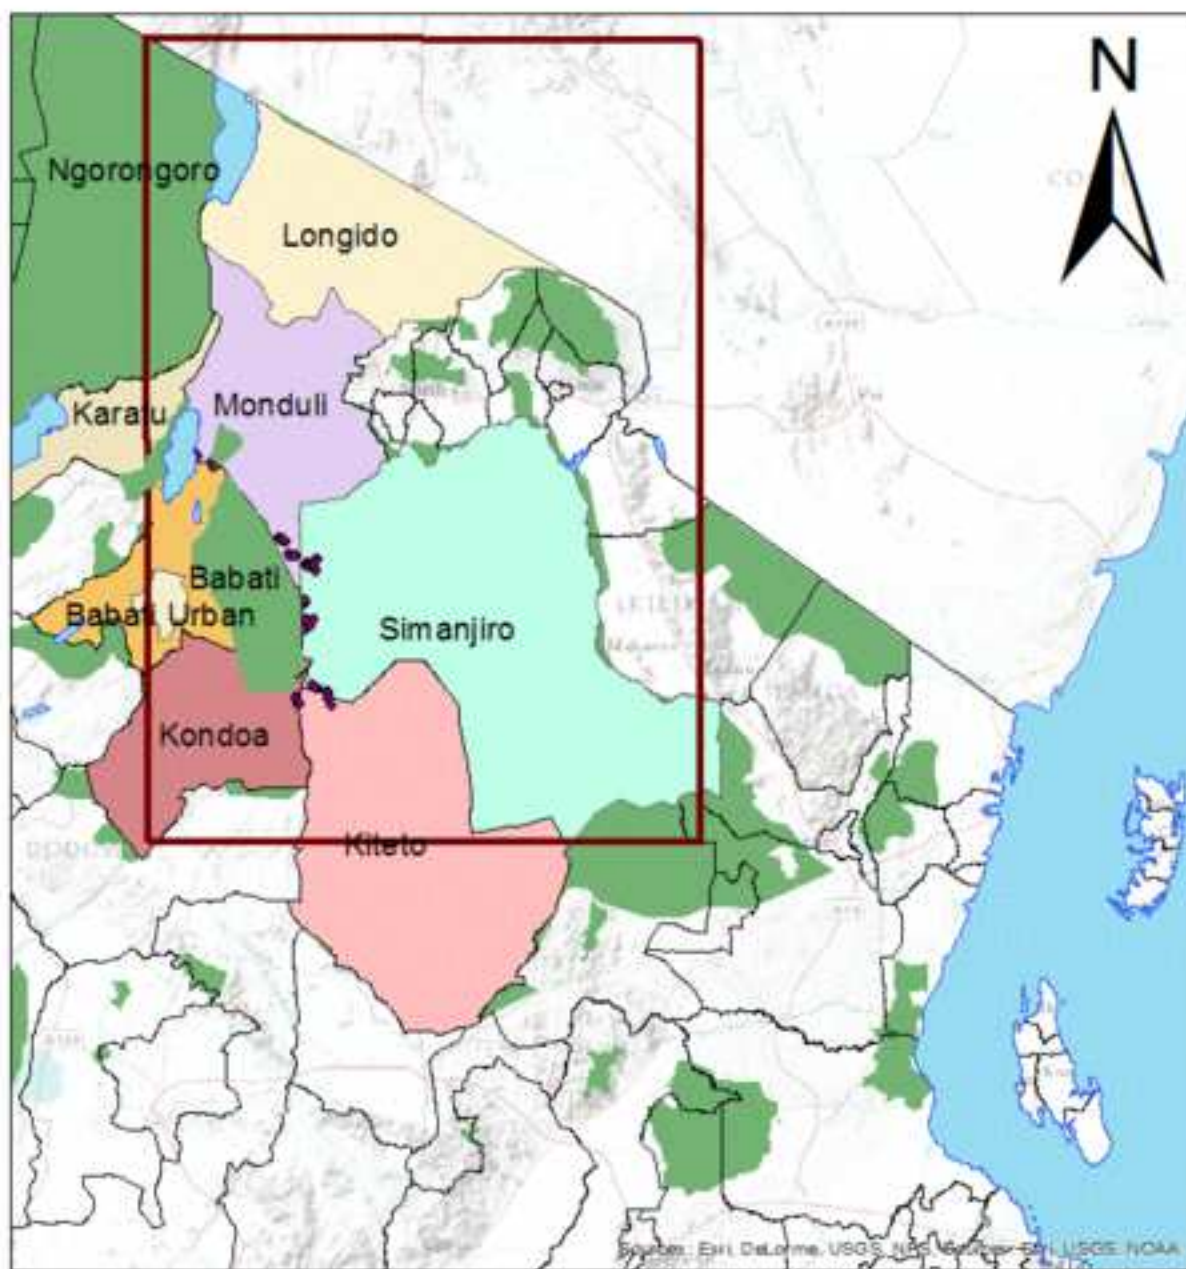

### Legend

-  Waterbodies
-  Protected\_Areas
-  Study area extent
-  Trap site

0 37.5 75 150 Kilometers

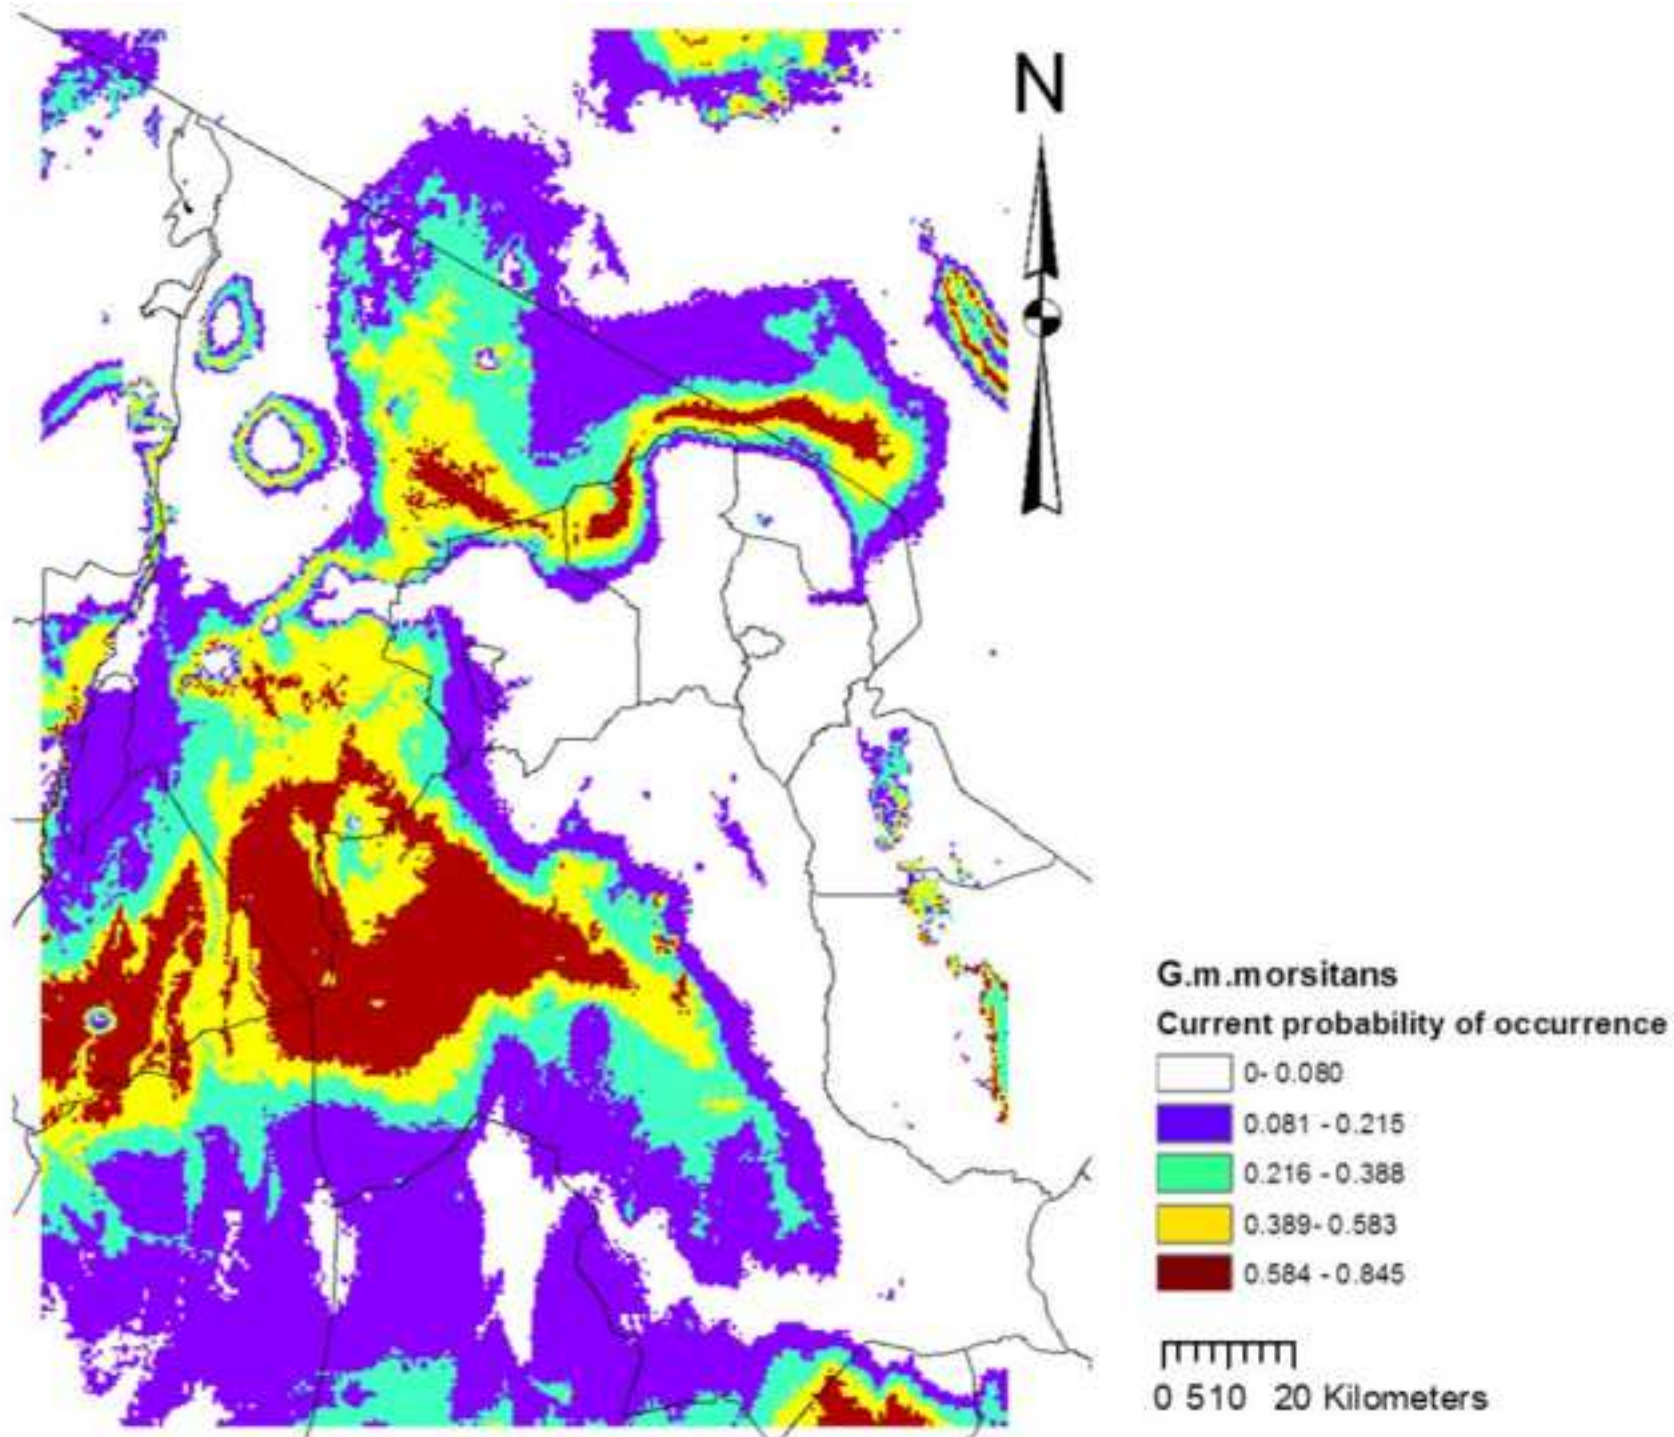

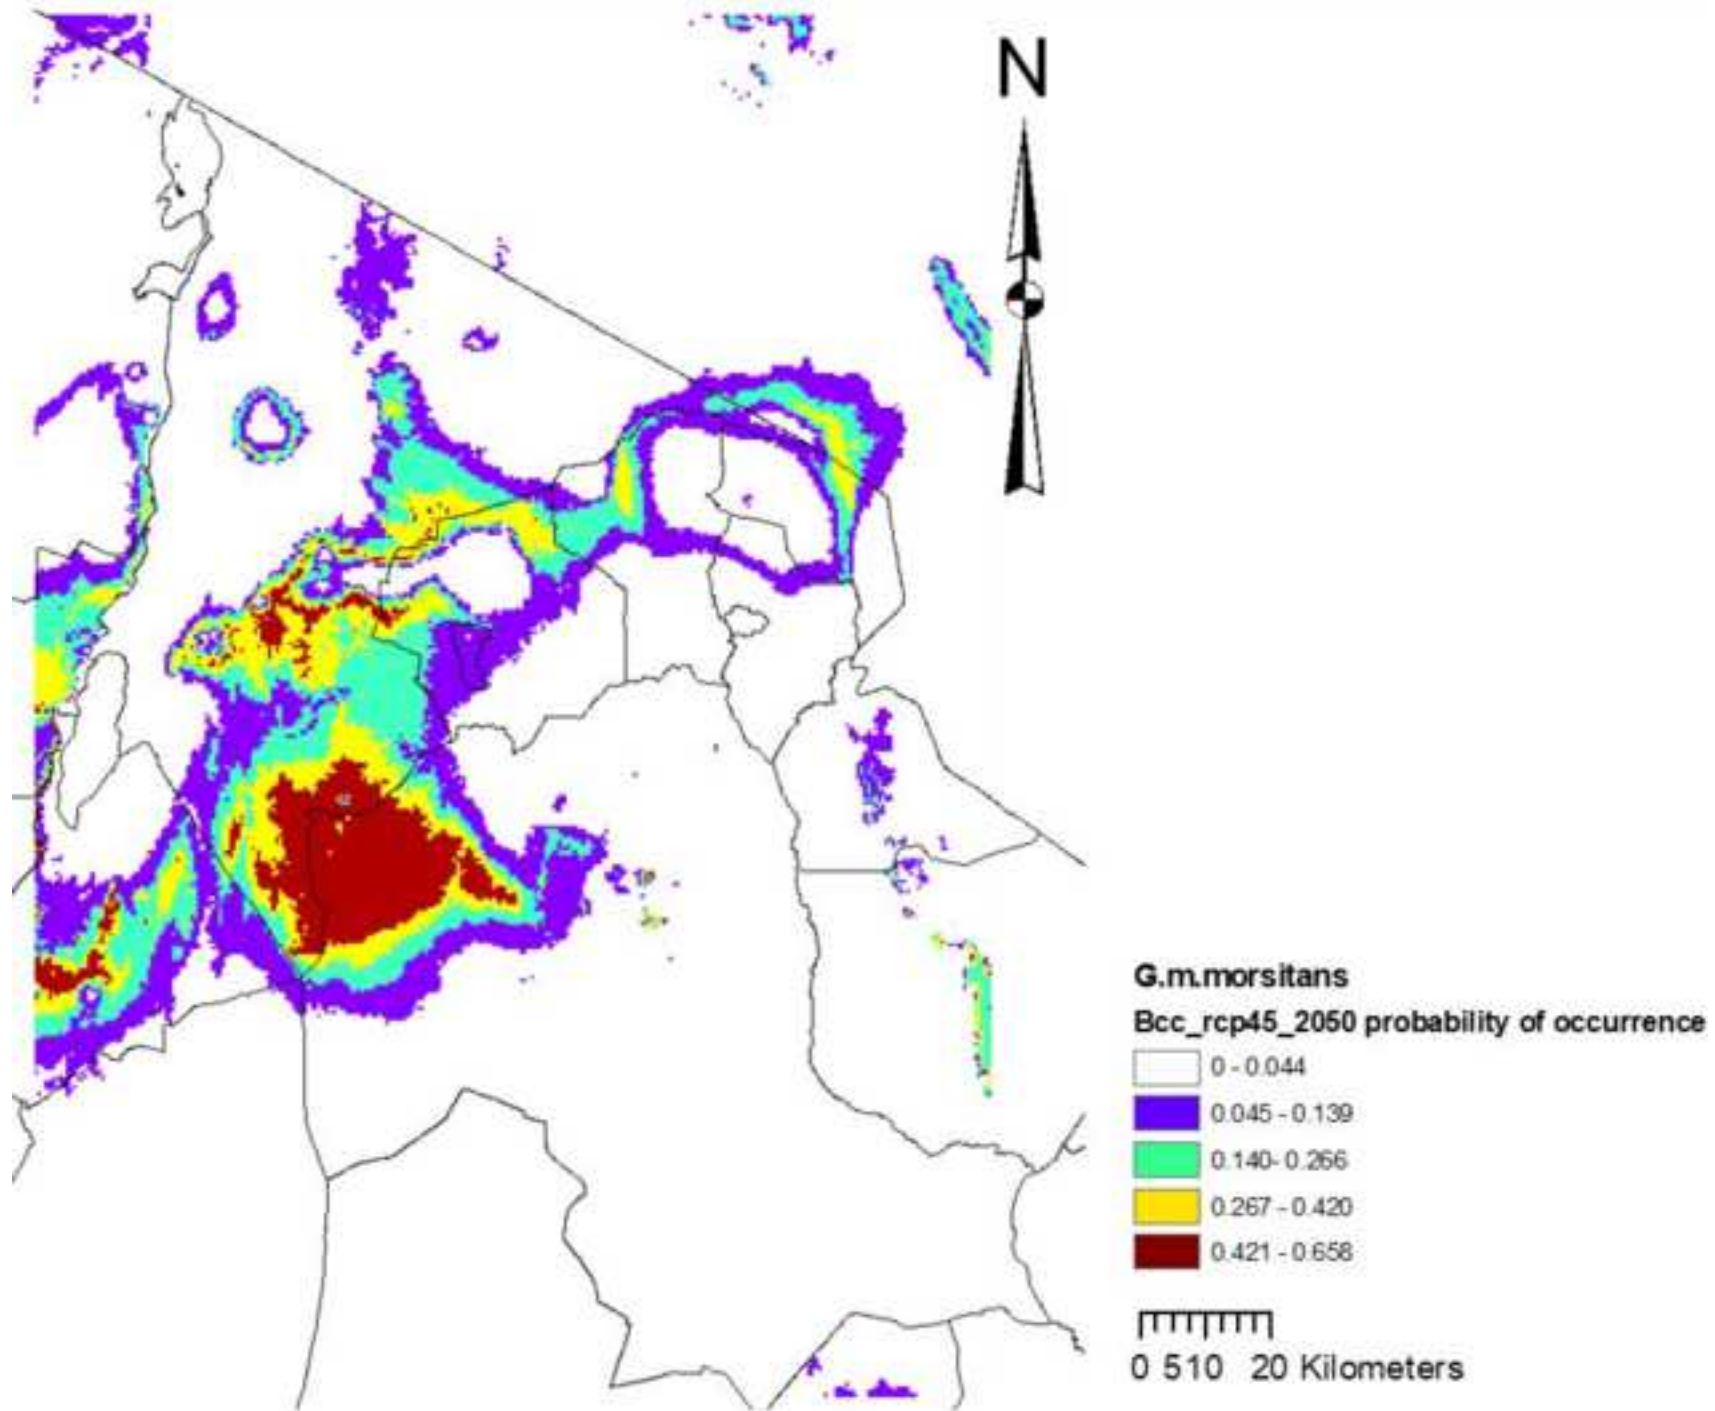

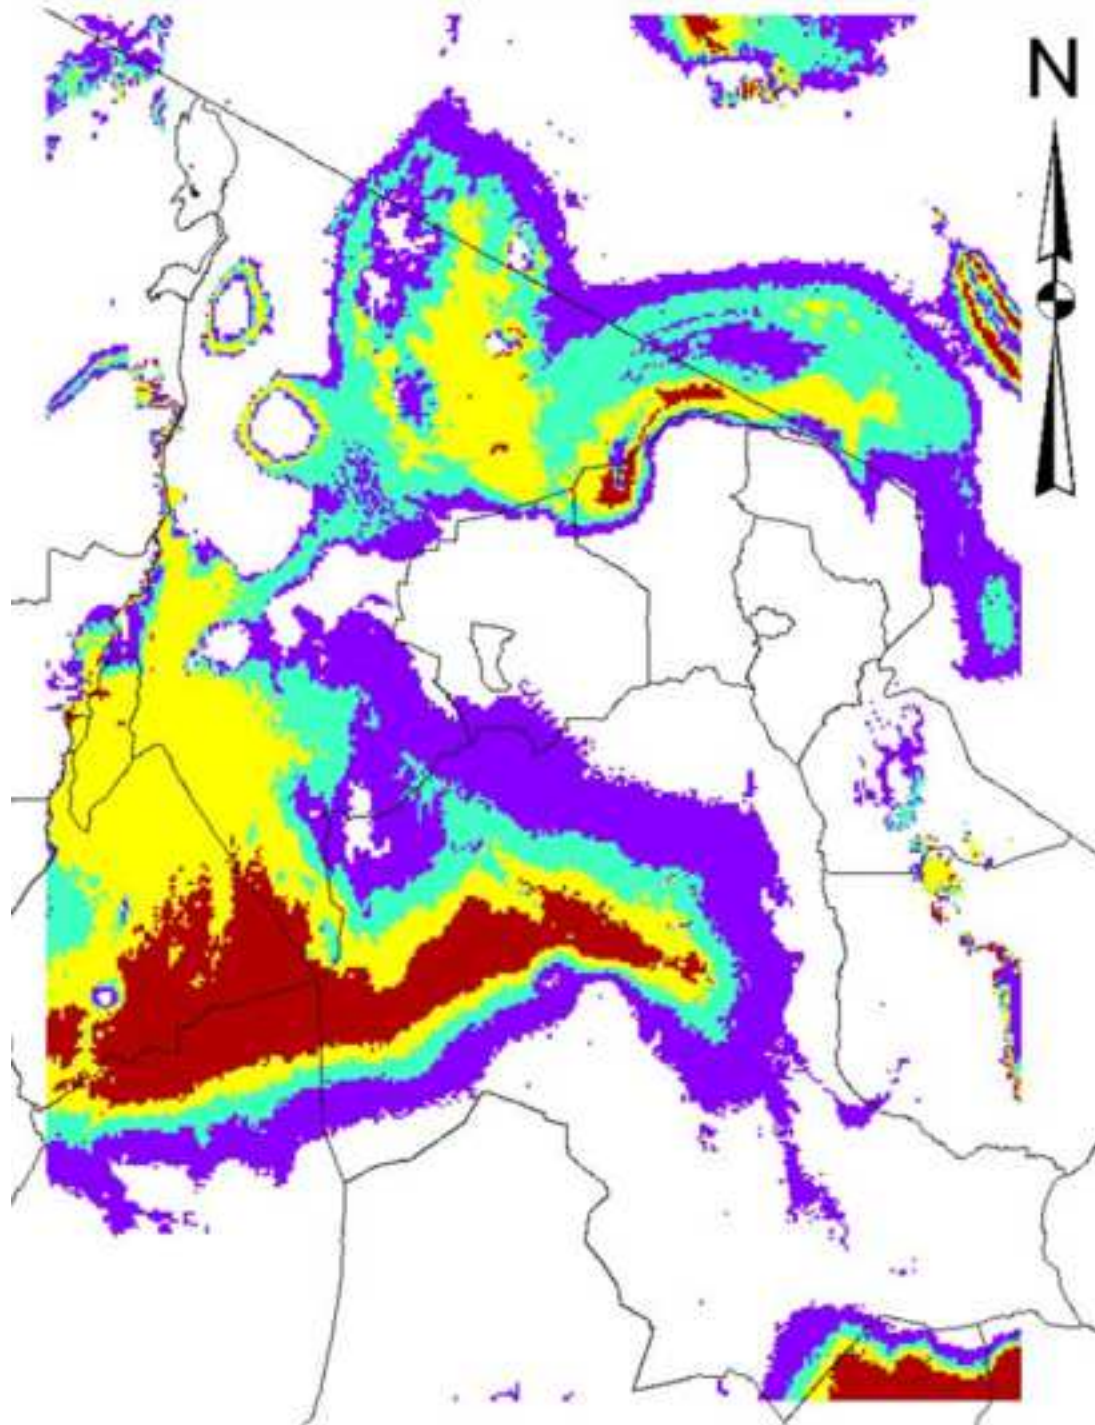

**G.pallidipes**

**Current probability of occurrence**

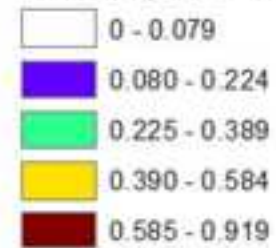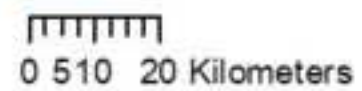

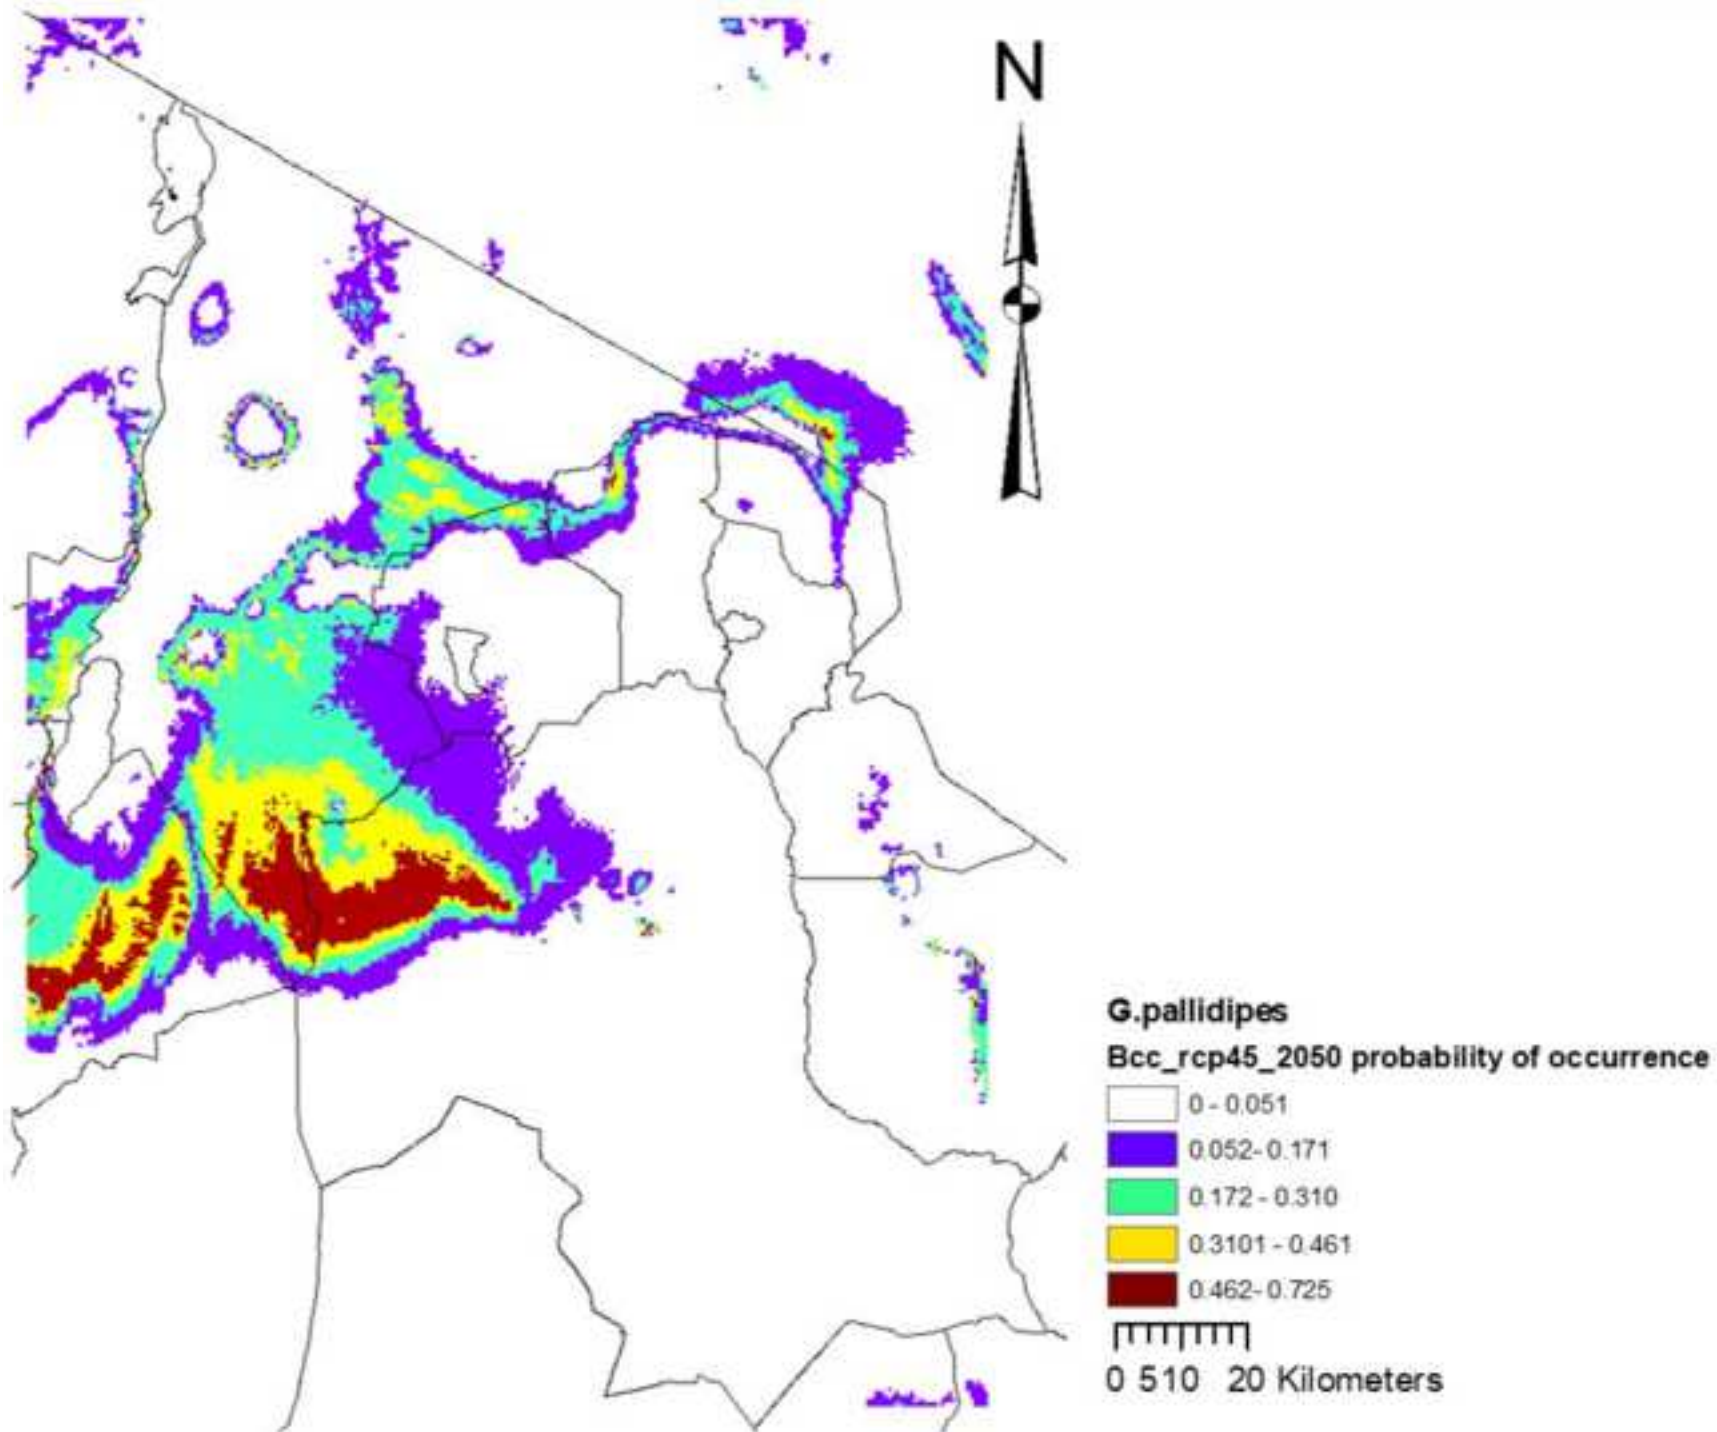

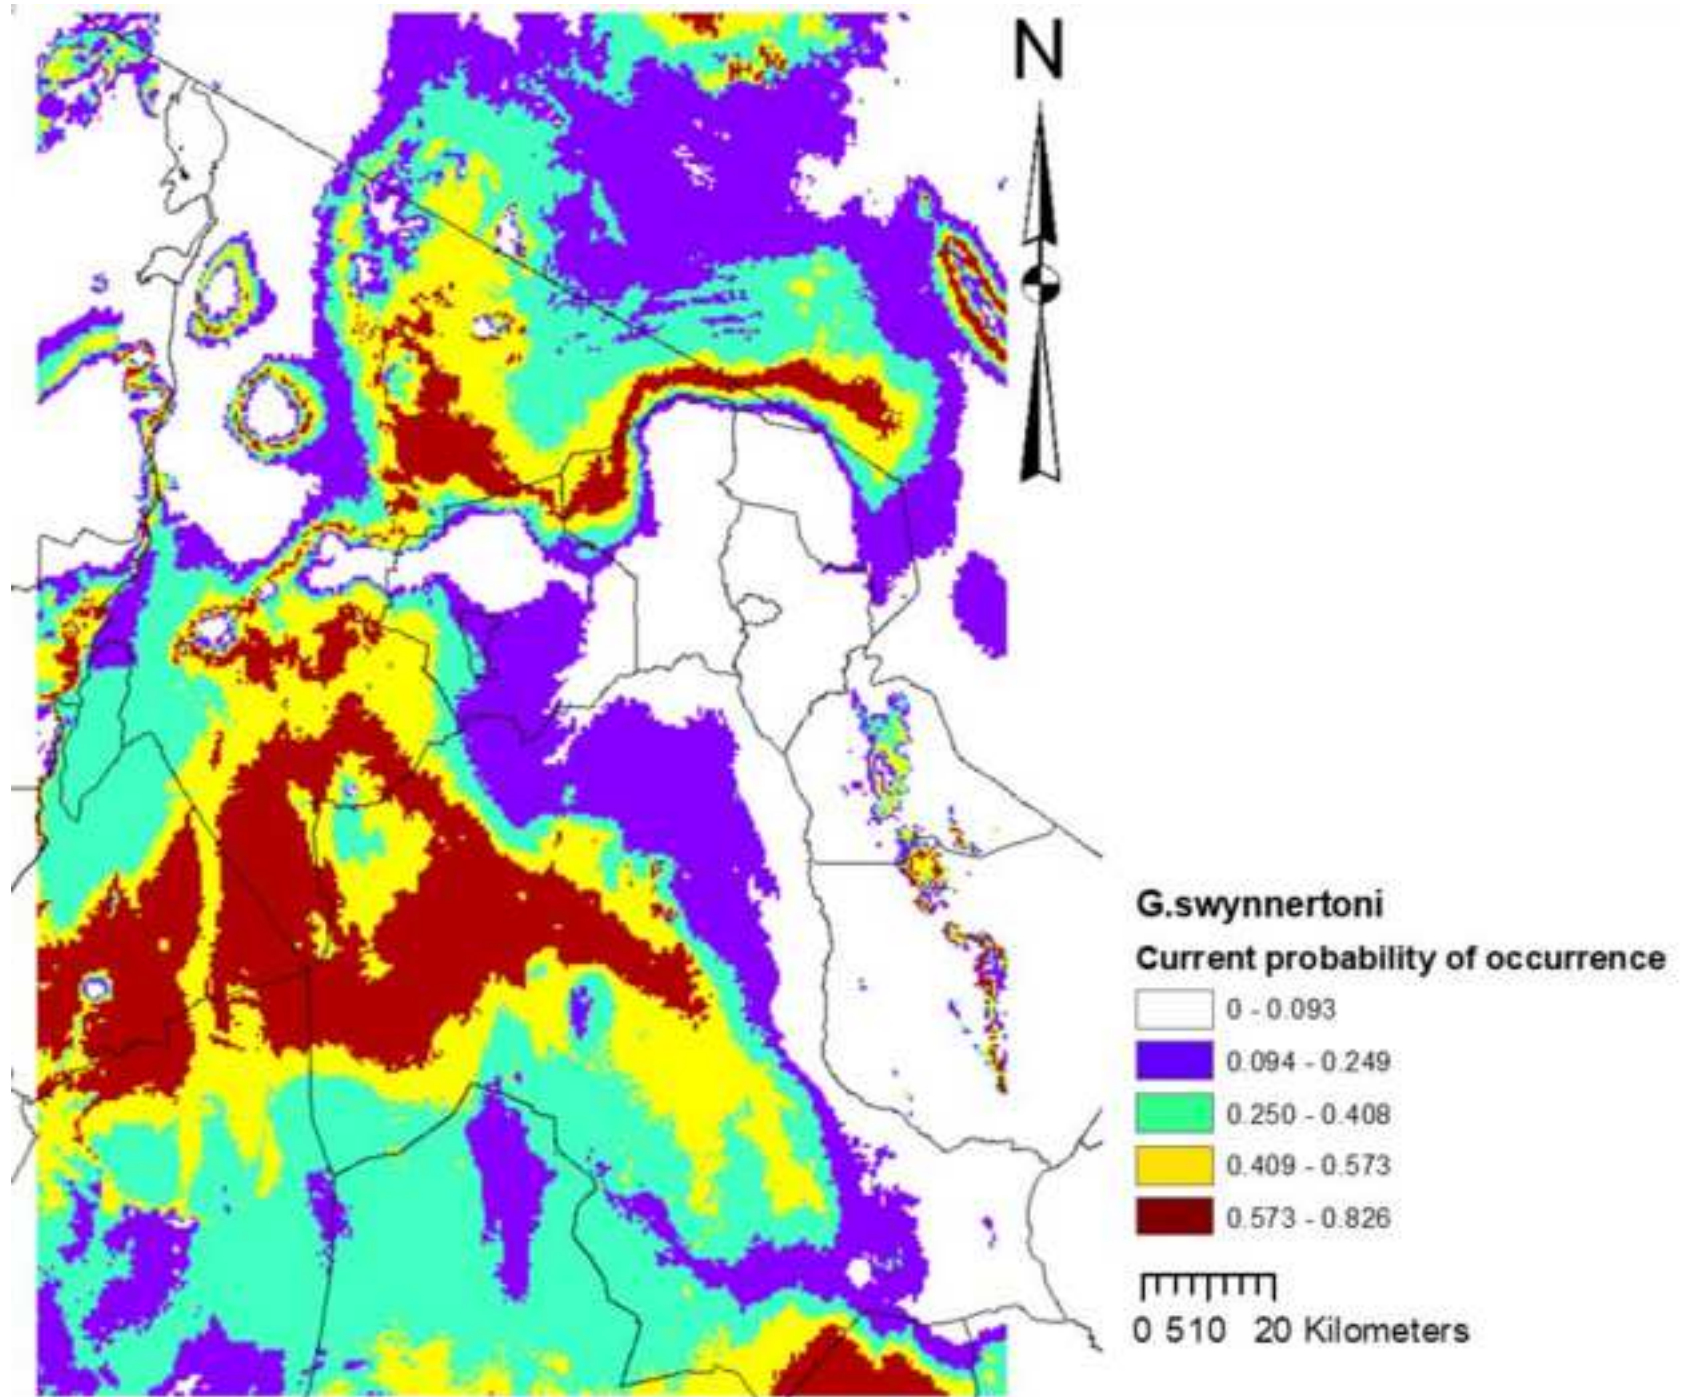



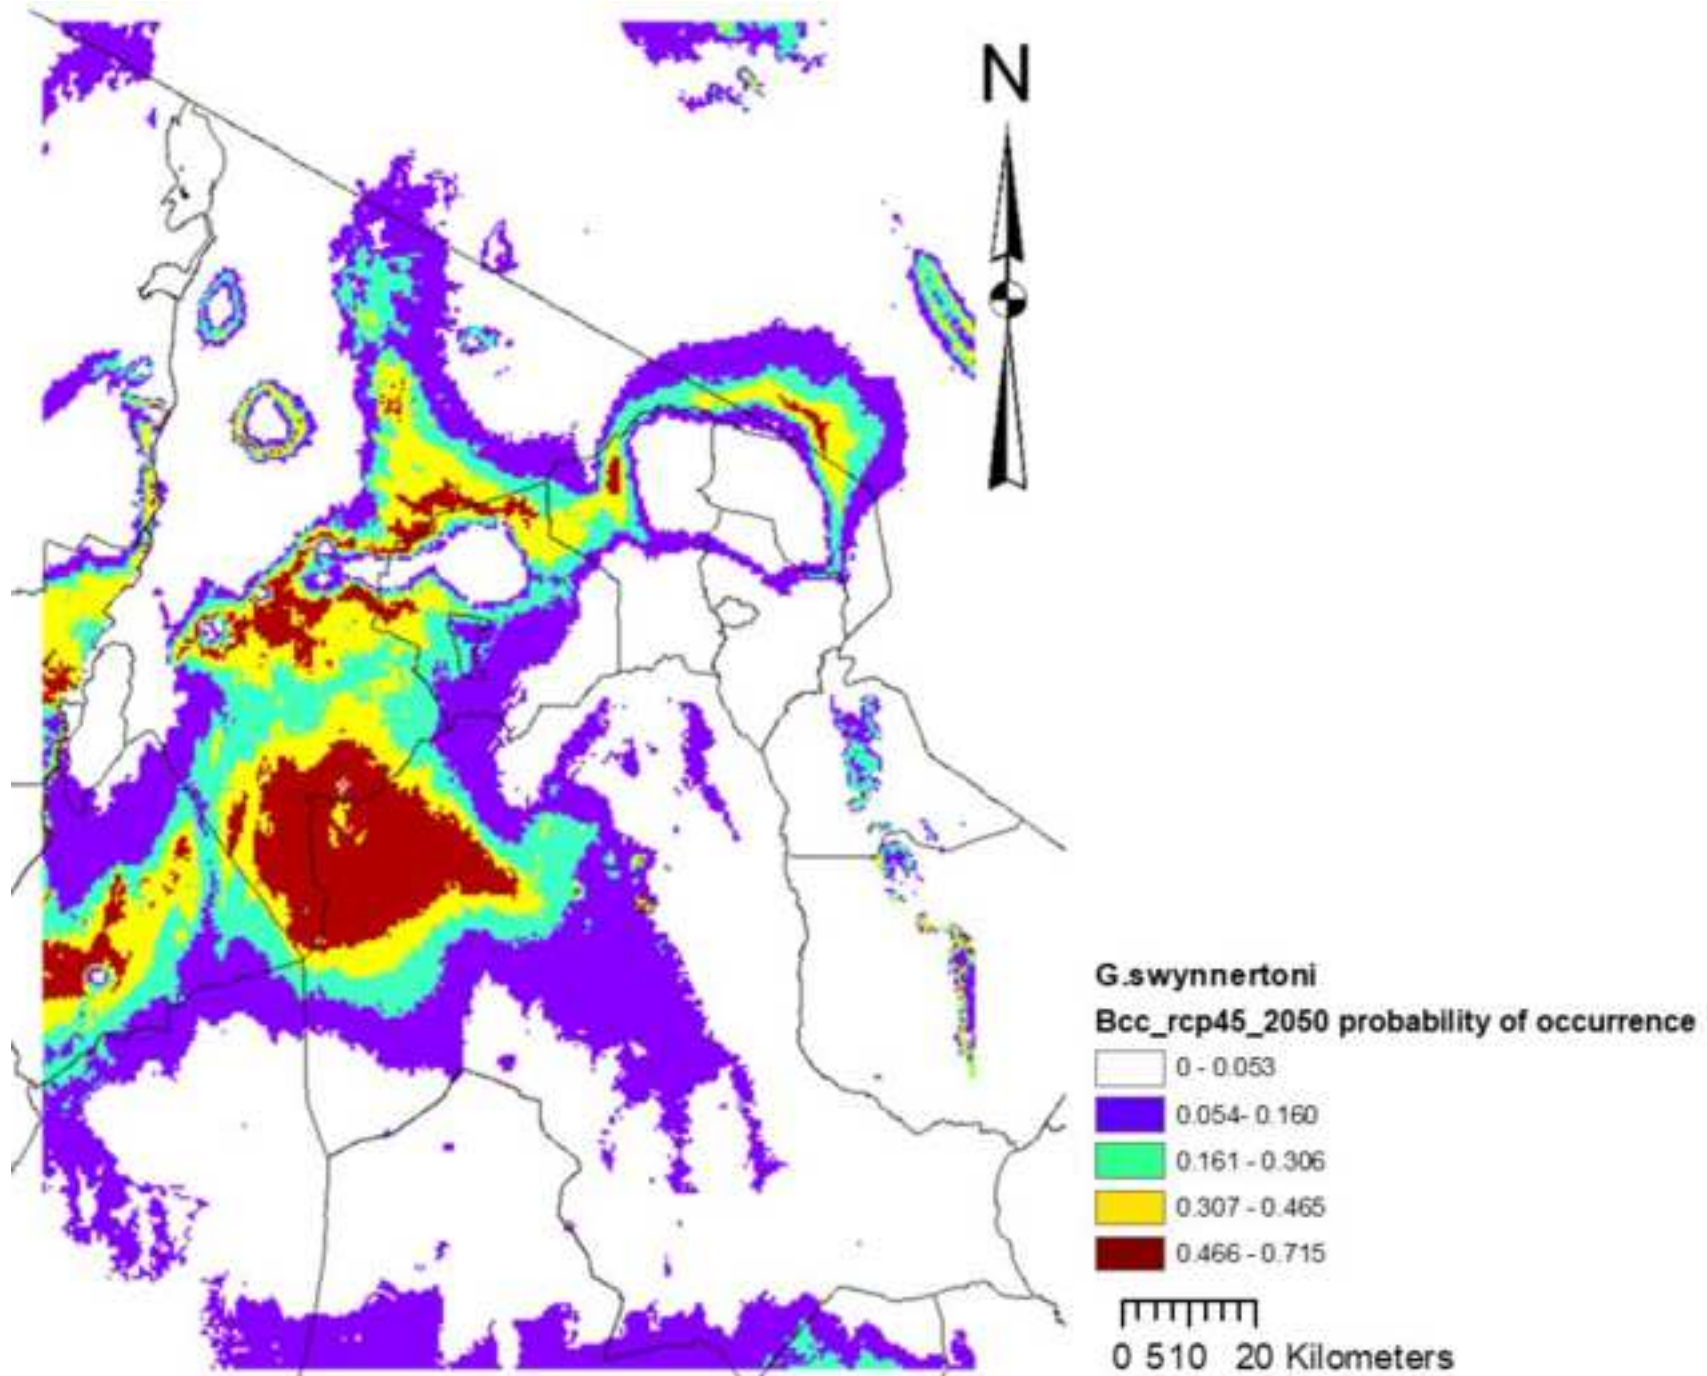

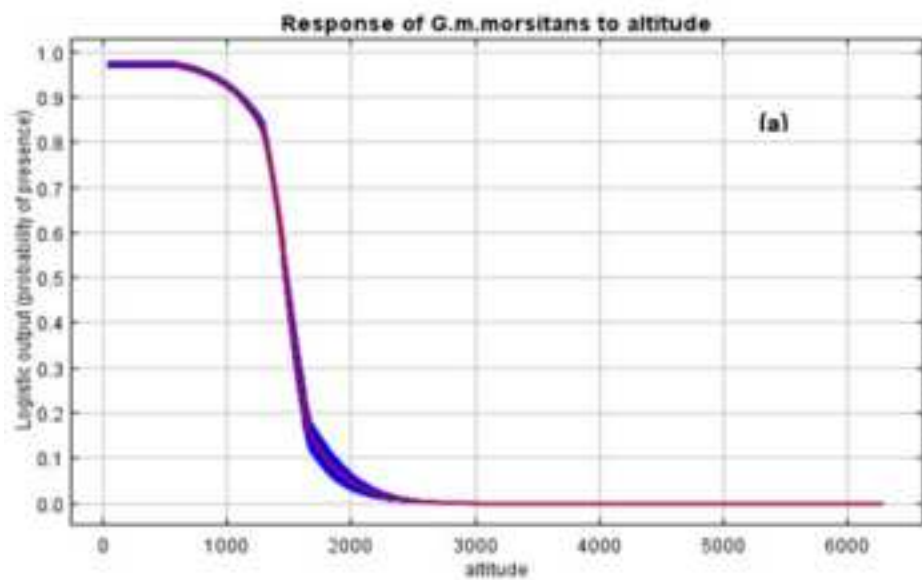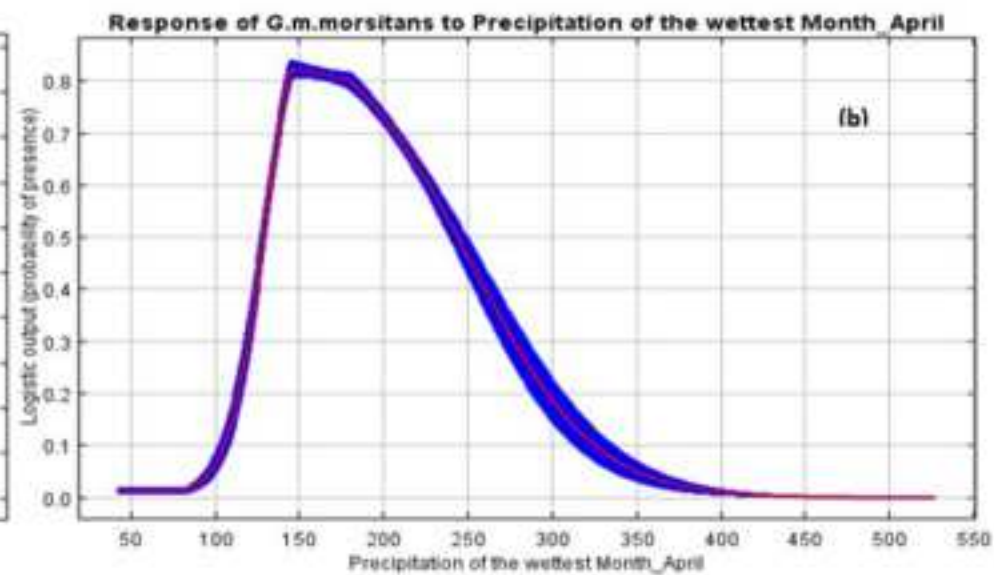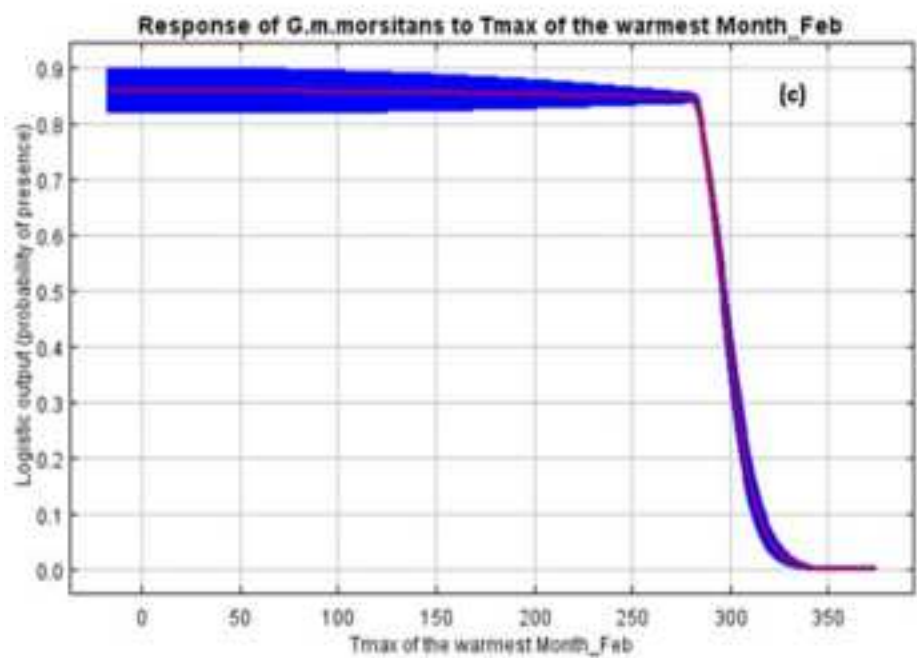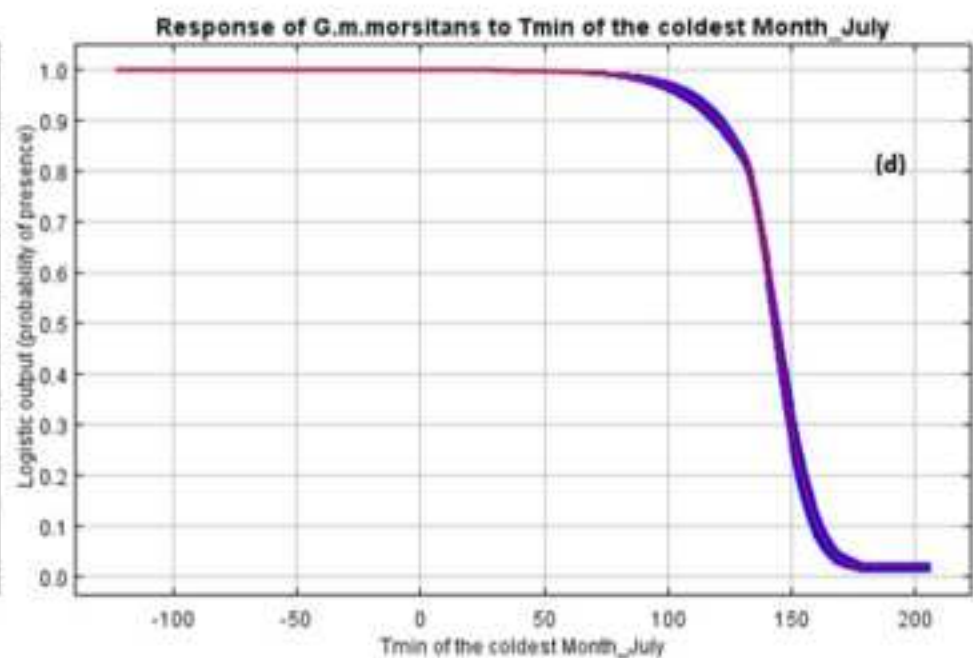

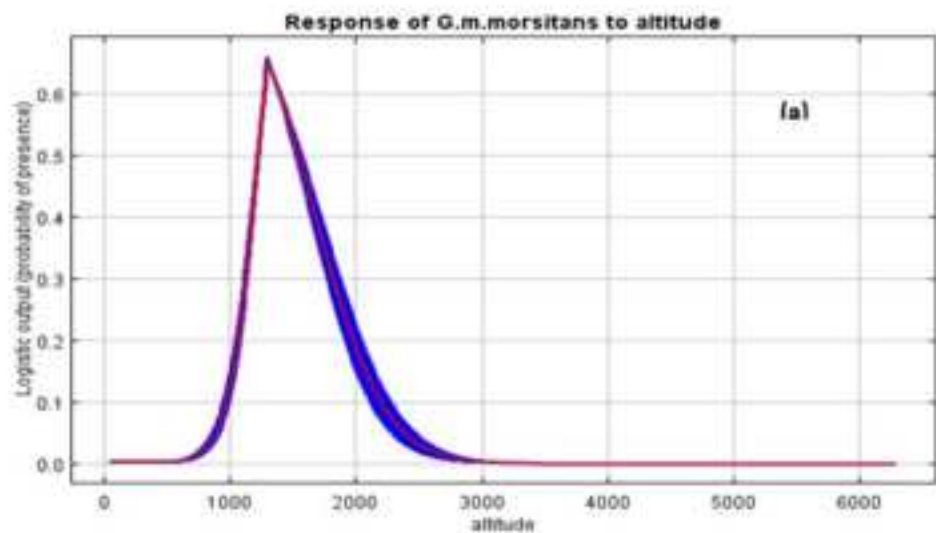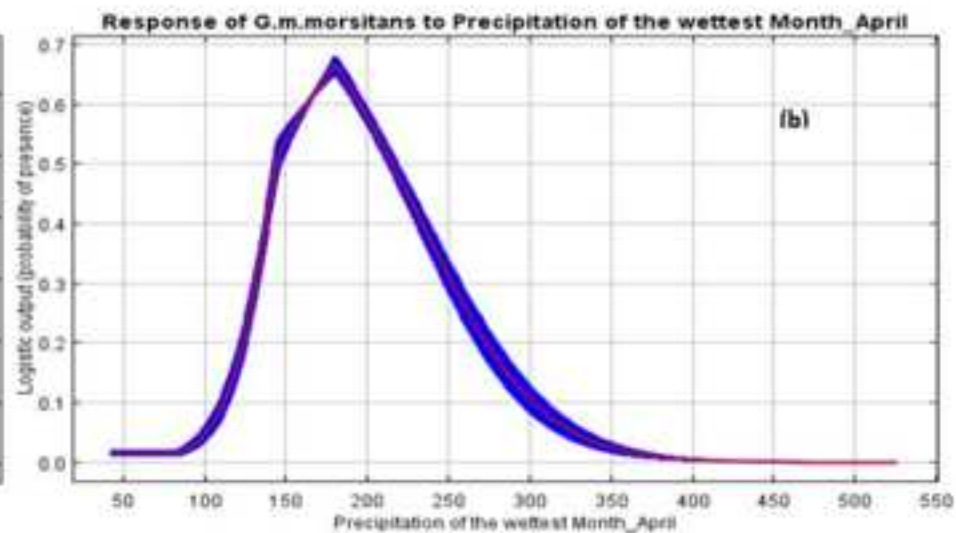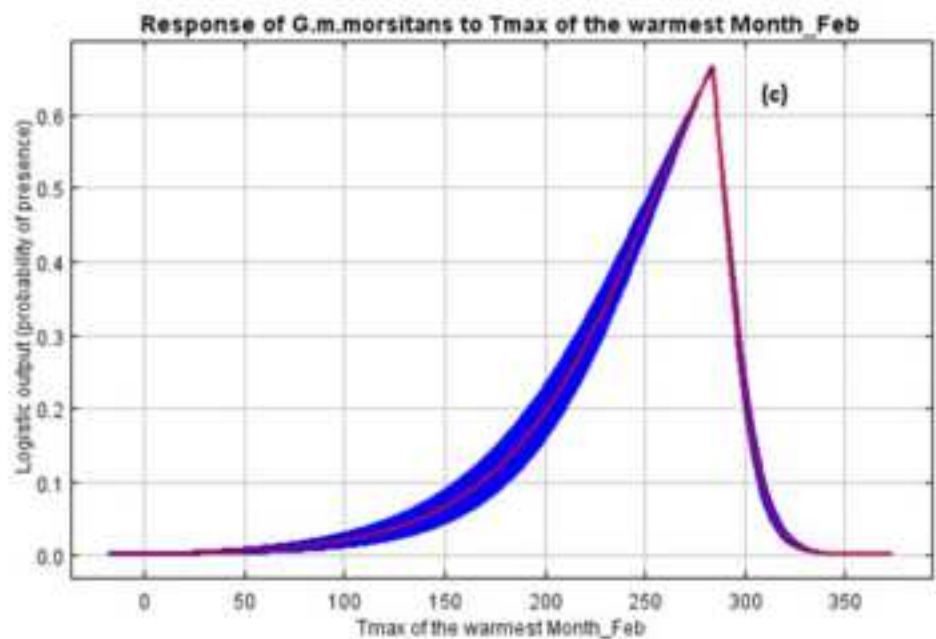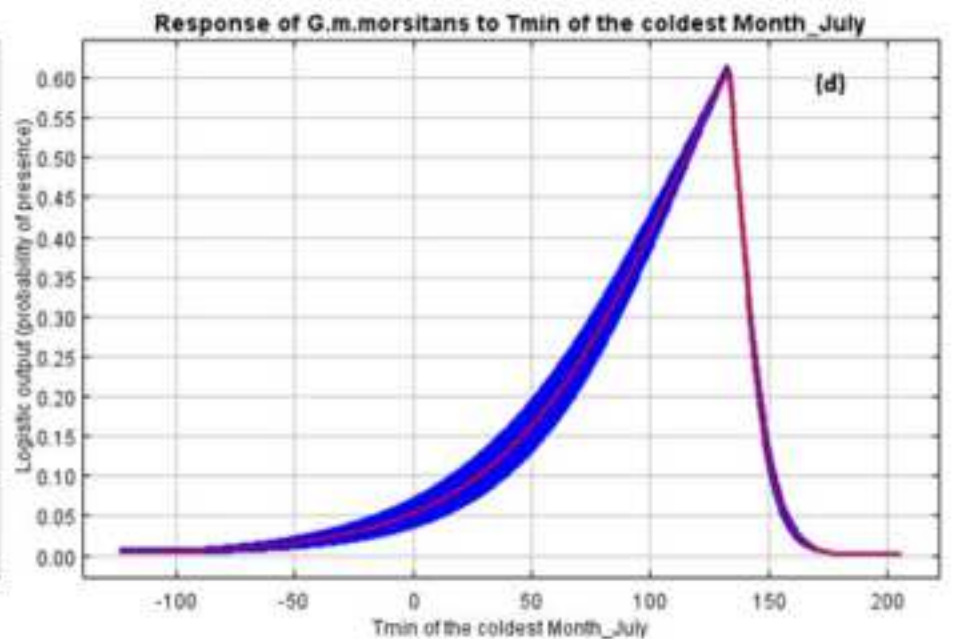

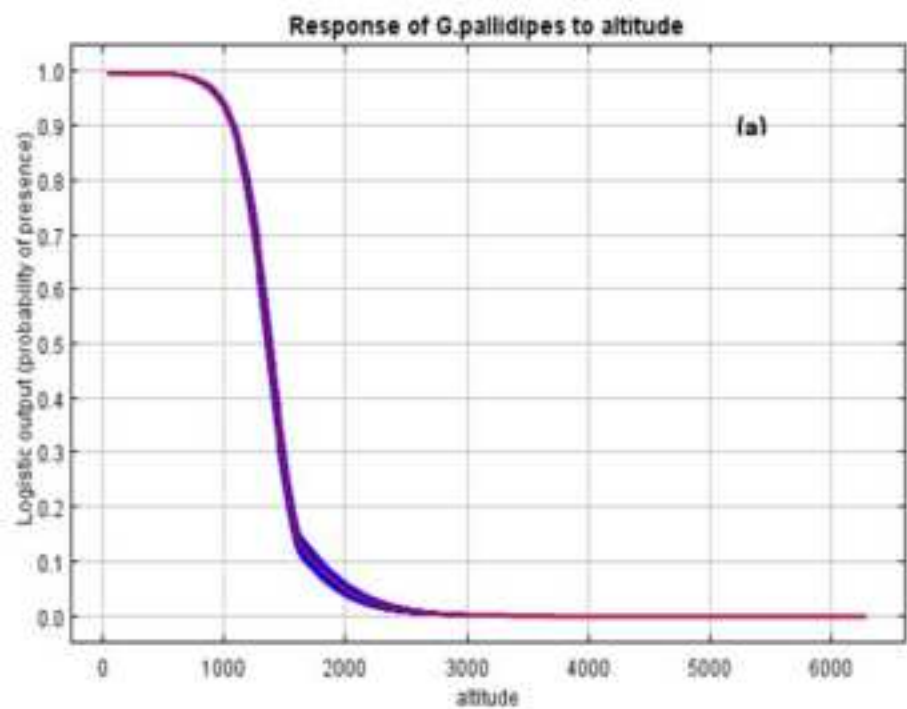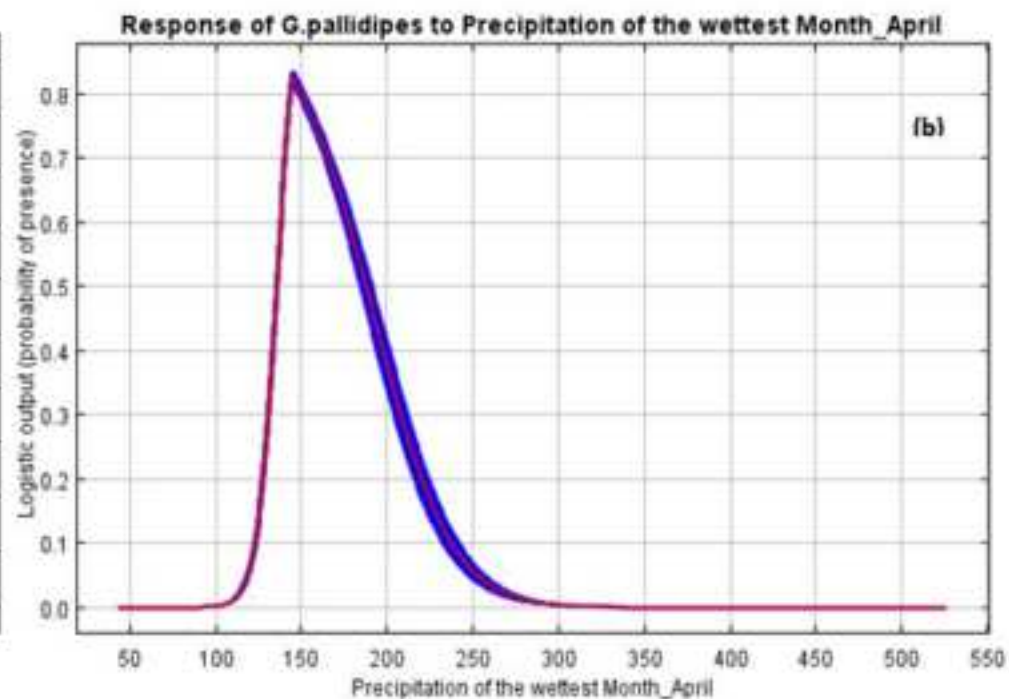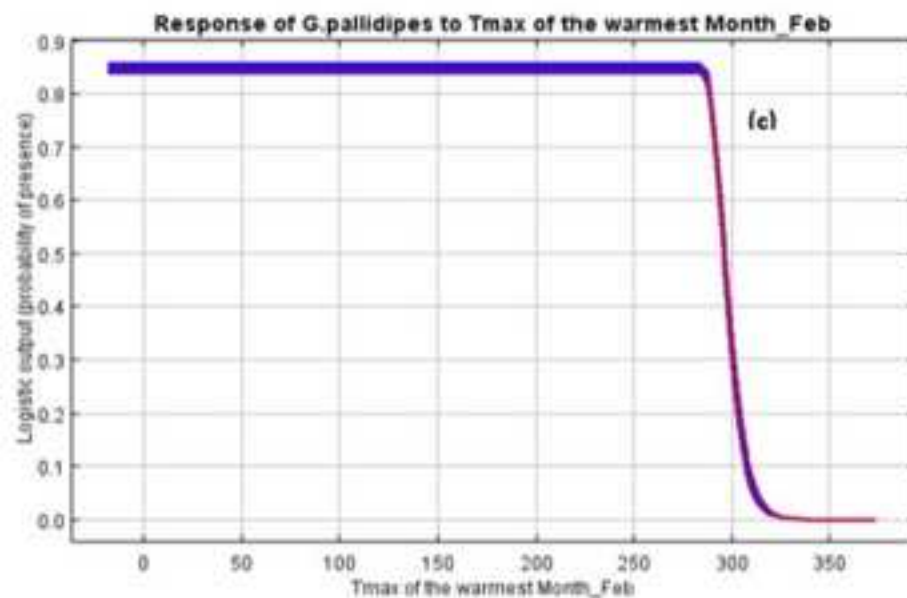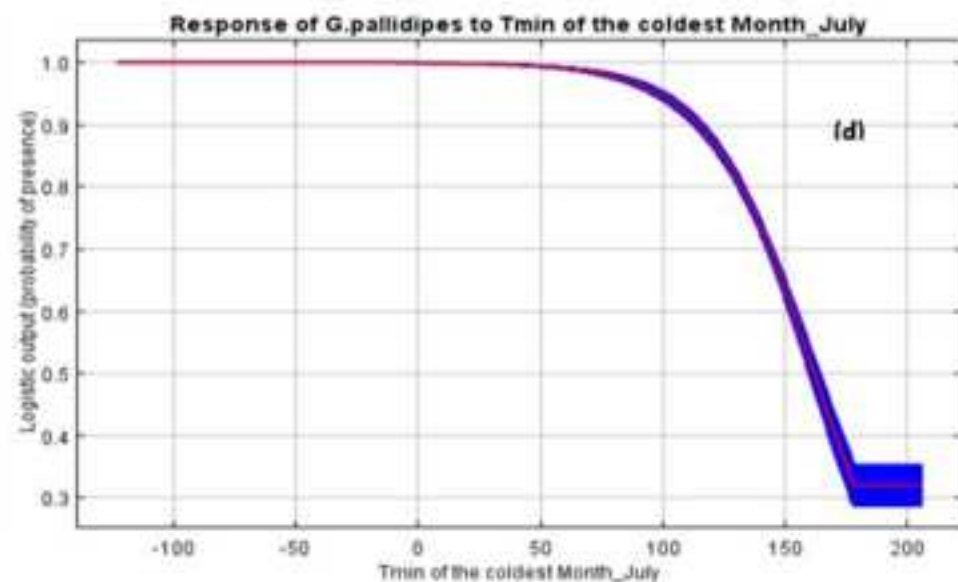

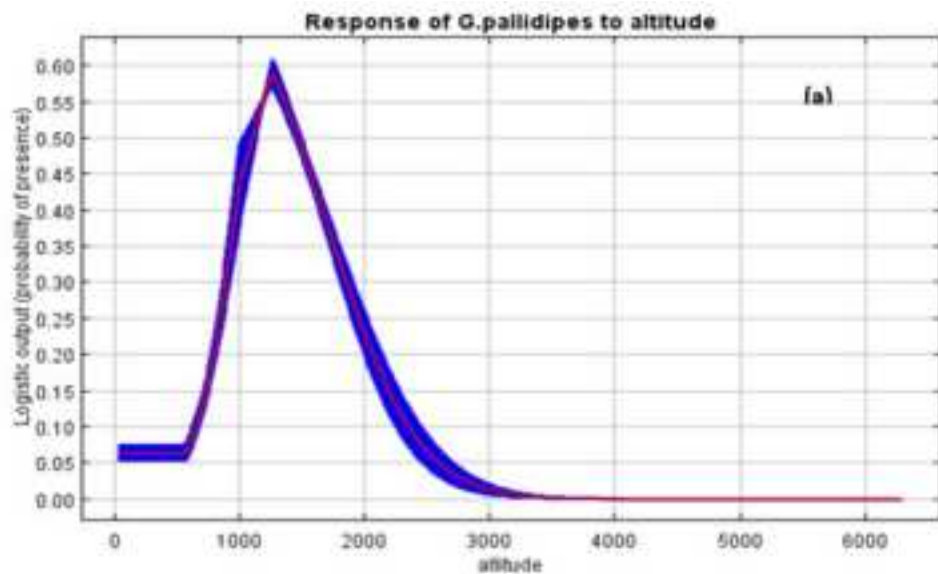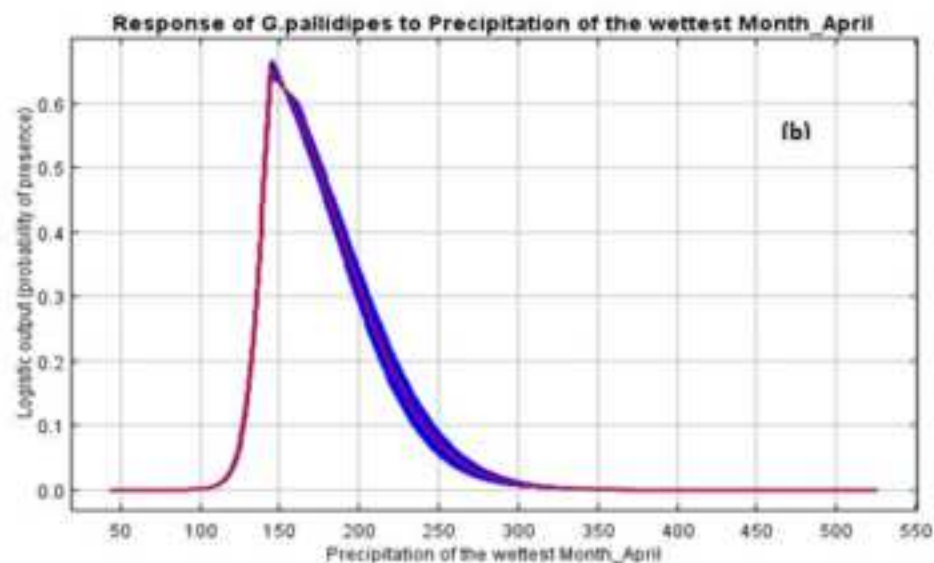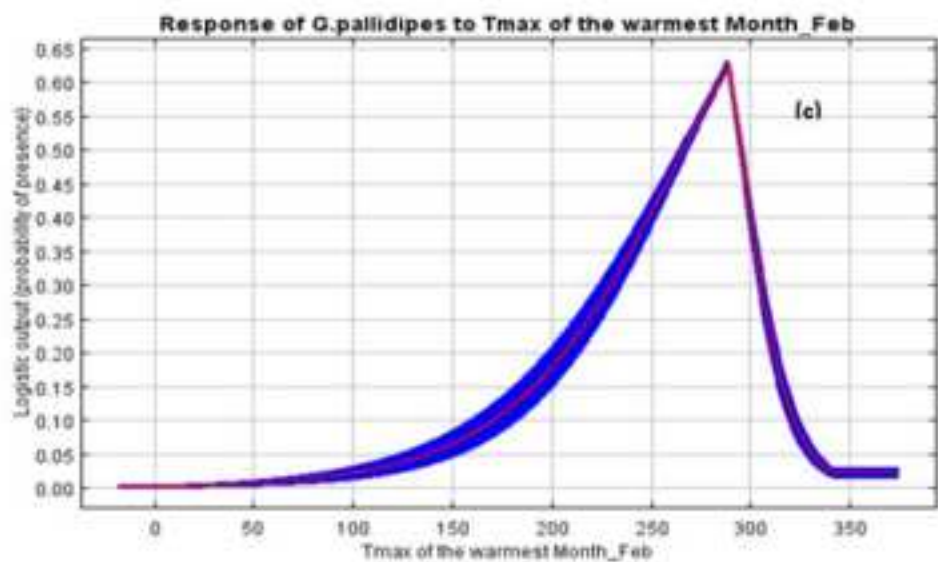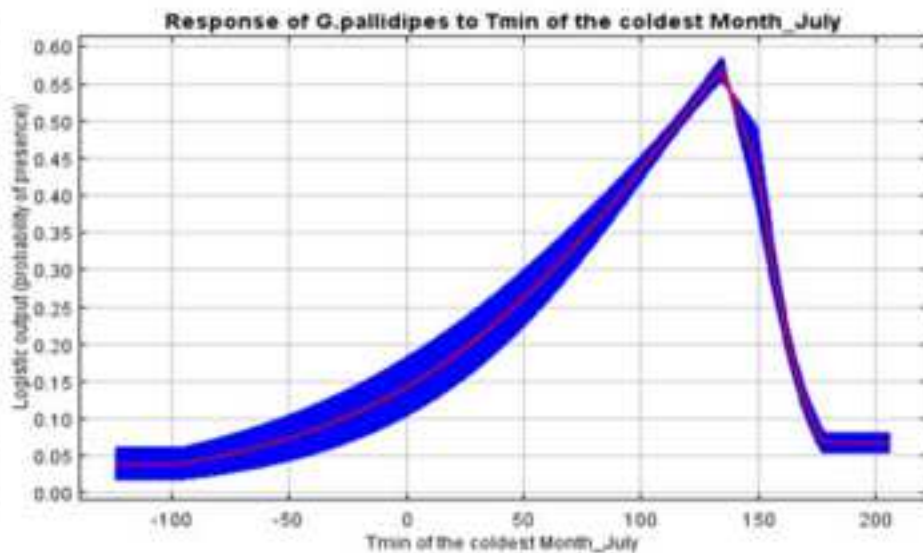

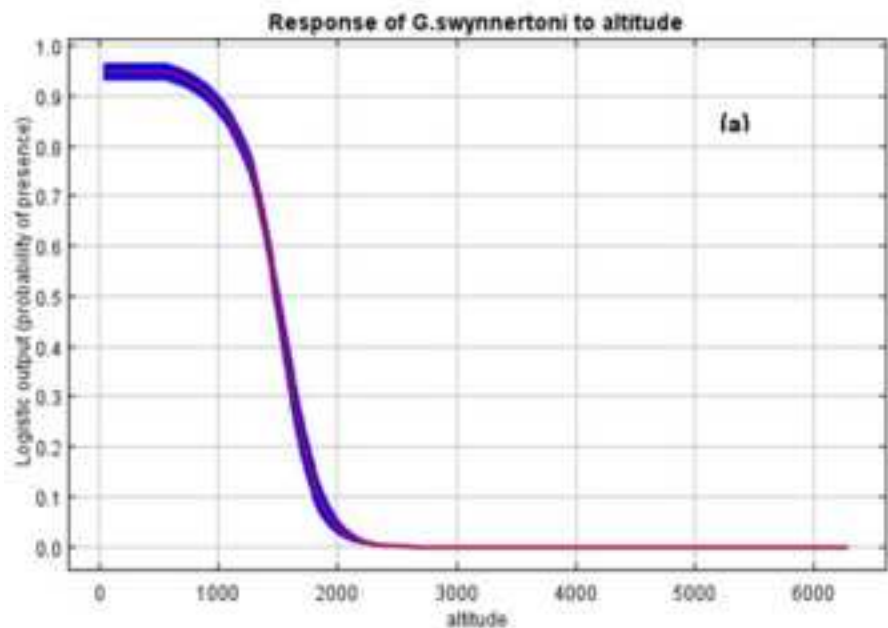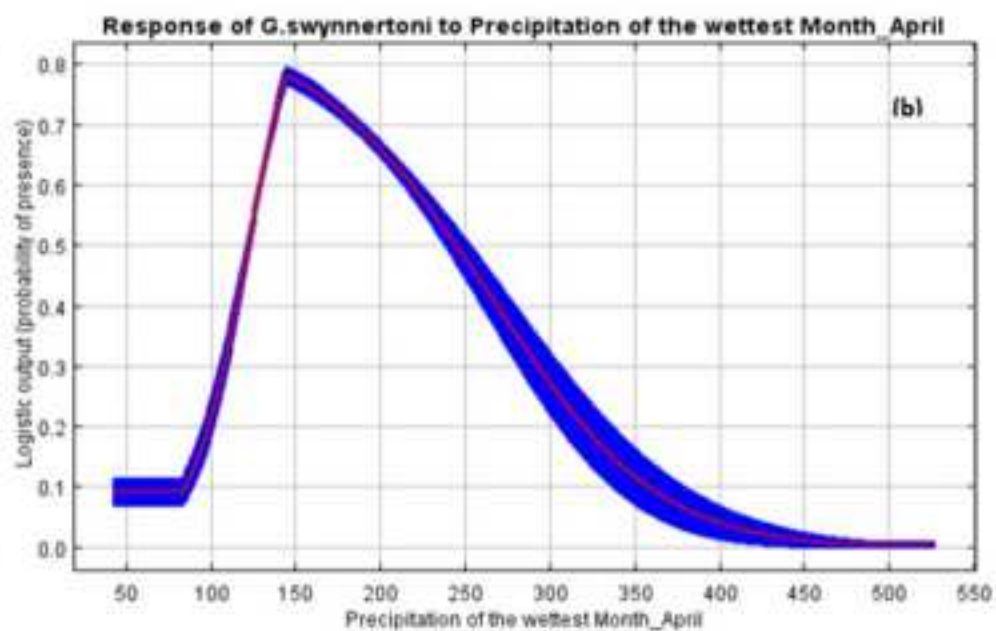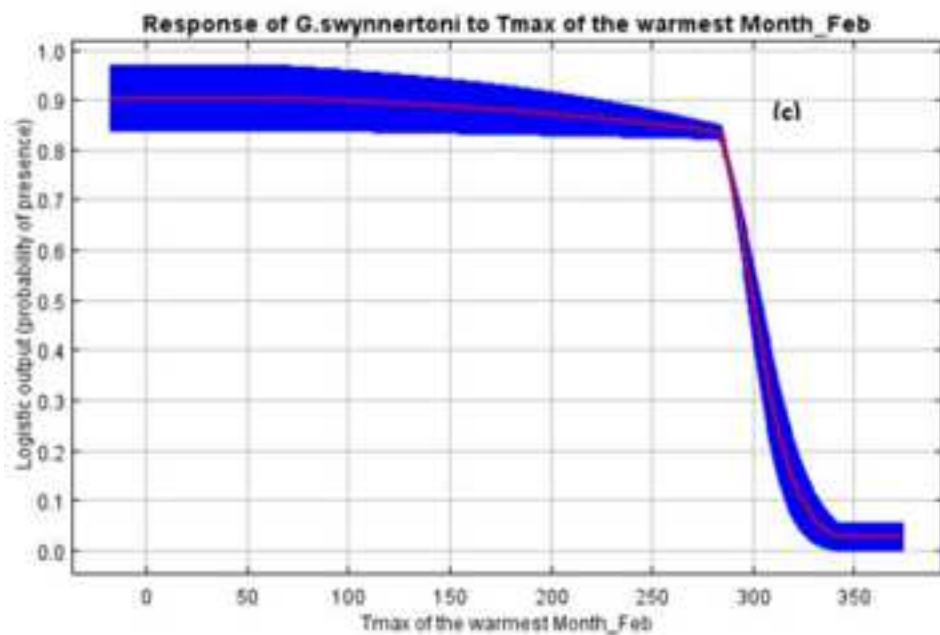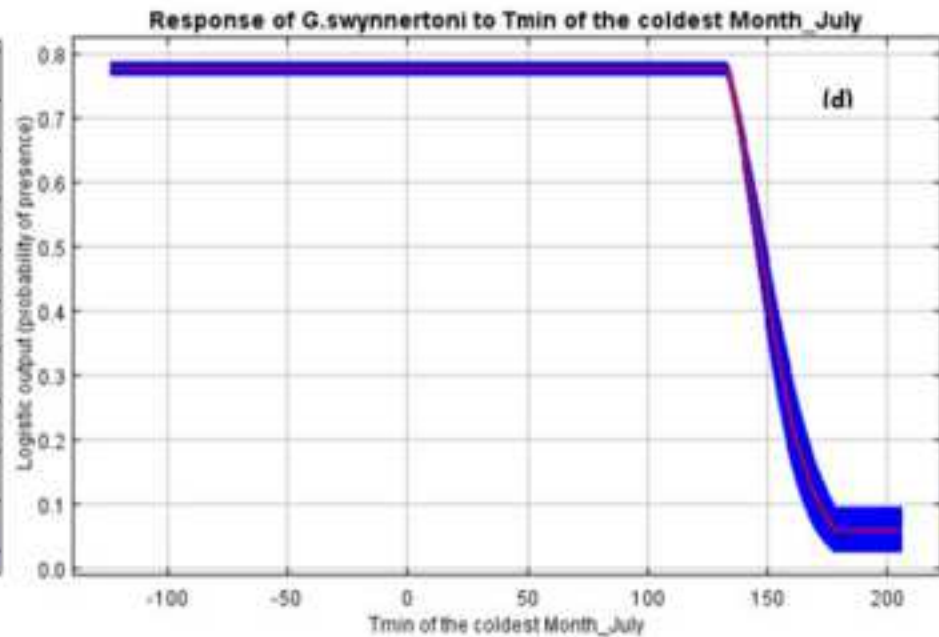

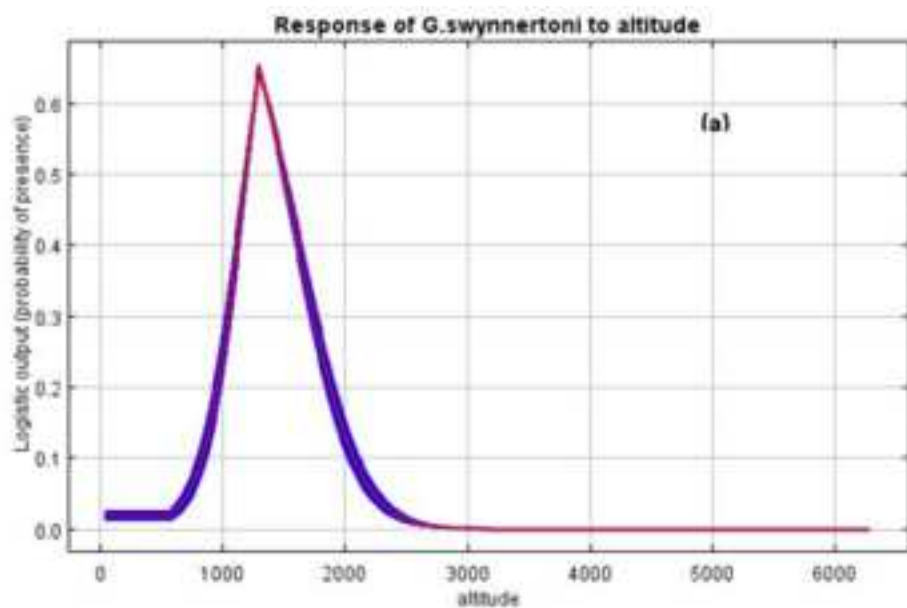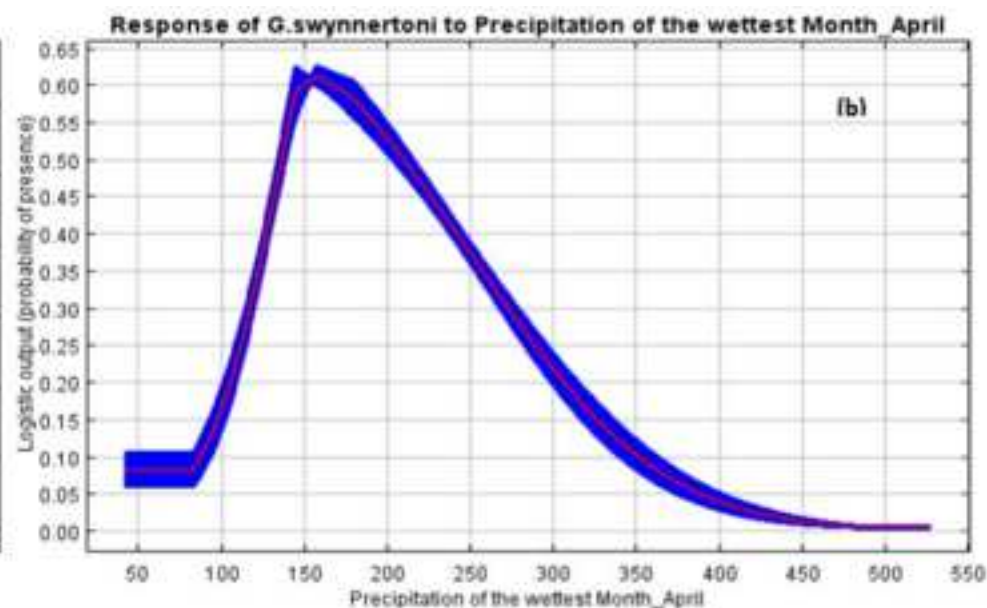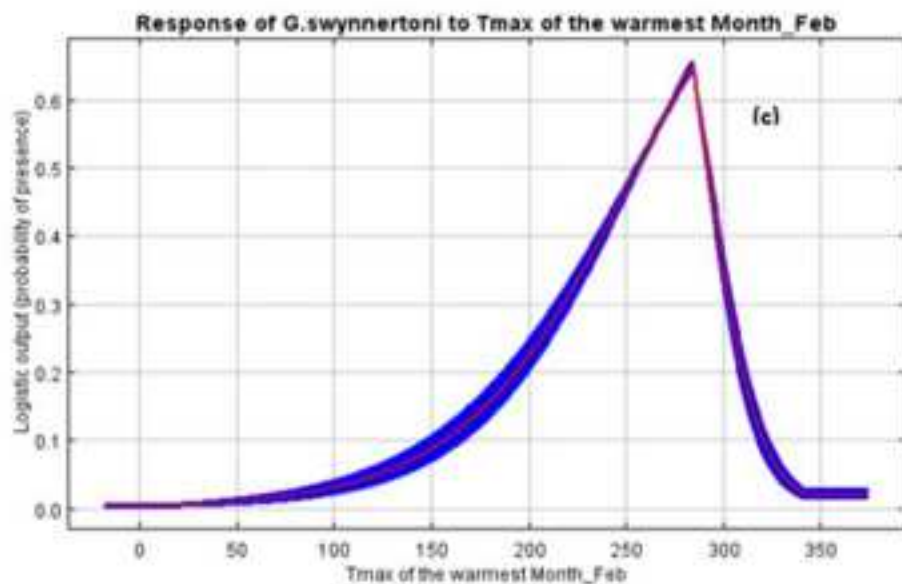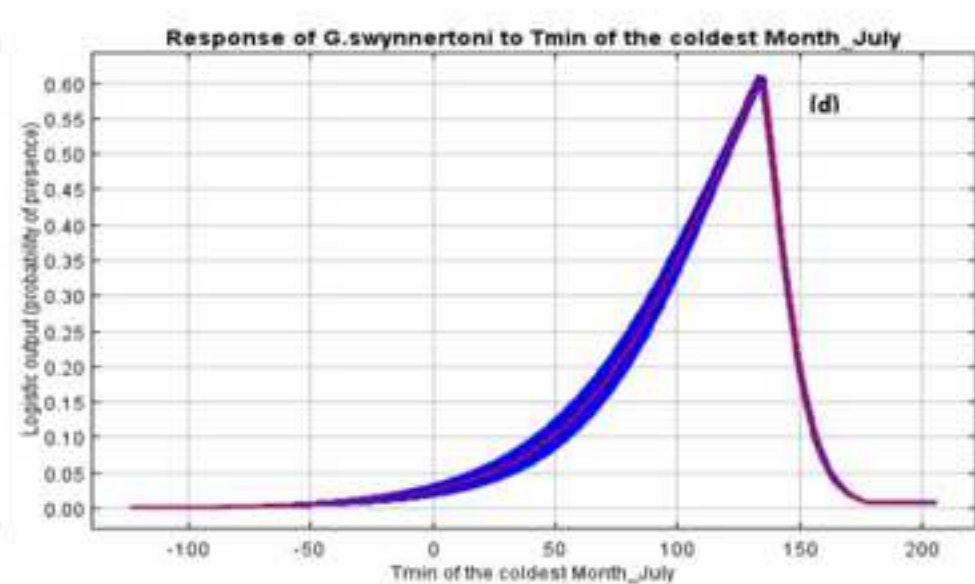

**Full title:** Potential Impacts of Climate Change on Geographical Distribution of Three Primary Vectors of African Trypanosomiasis in Tanzania Maasai Steppe; *G. m. morsitans*, *G. pallidipes* and *G. swynnertoni*

**Short title:** Climate Change and Vectors of African Trypanosomiasis
